# Supplementary material for: Molecular Foundations of Reproductive Lethality in Arabidopsis thaliana
Source: PLoS One. 2011 Dec 2;6(12):e28398. doi: 10.1371/journal.pone.0028398 (PMC3229588; doi:10.1371/journal.pone.0028398)
Supplement: Table S1 — Updated SeedGenes dataset of 396 EMB genes of Arabidopsis . (XLS) [file pone.0028398.s001.xls]

## Sheet: Table S1
Locus	GeneSymbol	IdentityStatusb	CPT Rankc	Gene Redundancy (BLASTP)d	Gametophyte Classe	Strongest Allele Phenotype	Maximal Allele Strength	Protein Function Class	Predicted Protein Function	Additional Comments on Predicted Protein Function
At1g01040	SUS1	C		Redundant		G	A.1	2.3	RNA Helicase	Similar in sequence to a Drosophila protein (Dicer) involved in cleavage of dsRNAs and gene silencing during development
At1g01370	CENH3	C		Unique	ND	NA	NA	6.1	Centromere-Specific Histone	Component of centromeric nucleosomes
At1g02560	CLPP5	C	4	Redundant		G	A.1	5	Chloroplast Clp Protease Subunit	None
At1g02780	EMB2386	NC		Redundant		G	A.3	3.1	Ribosomal Protein L19	Translation in cytoplasm
At1g03360	RRP4	C		Unique		P	A.2	2.3	rRNA Processing; Exonuclease	Exosome subunit; RNA metabolism
At1g04635	EMB1687	C		Unique		G	A.1	2.3	Ribonuclease P Family (POP5)	Processing of tRNAs
At1g04950	EMB2781	C		Redundant	GEM	P	C.3	7	TATA Box Binding Protein	Regulation of transcription
At1g05190	EMB2394	C	4	Unique		G	A.3	3.1	Chloroplast 50S Ribosomal Protein L6	Translation in chloroplast
At1g05600	EMB3101	C		Redundant		C	A.1	2.2	PPR Protein	Processing of organellar mRNAs
At1g06145	EMB1444	NC		Redundant		C	A.3	2.2	PPR Protein	Processing of organellar mRNAs
At1g06950	TIC110	C	4	Unique		G	B.3/ C.2	4.2	Chloroplast Import Protein	Membrane protein that facilitates protein import into chloroplasts
At1g07320	EMB2784	NC	4	Unique		G	A.2	3.1	Plastid Ribosomal Protein L4	Translation in chloroplasts
At1g08130	LIG1	NC		Redundant		NA	NA	1	DNA Replication and Repair	Joining of adjacent polynucleotides
At1g08260	EMB2284	C		Redundant		G	A.1	1	Subunit of DNA Polymerase Epsilon	DNA replication and perhaps DNA repair and cell cycle control
At1g08510	FATB	C	1	Redundant		C	A.3	10.1	Acyl-Acyl Carrier Protein Thioesterase	Saturated fatty acid biosynthesis
At1g08560	KN	C		Redundant	ND	C	NA	11.3	Cytokinesis-Specific Syntaxin	Promote vesicle fusion in cell division plane
At1g08840	EMB2411	C		Redundant		G	A.1	1	Helicase/Nuclease (Dna2)	DNA replication; Okazaki fragment metabolism
At1g09770	AtCDC5	NC		Unique		P / Z	C.2	7	MYB Domain Transcription Factor	Cell cycle control
At1g10270	GRP23	C		Redundant		P	B.1	7	Novel PPR Protein	Putative transcriptional regulator; interacts with RNA polymerase II
At1g10510	EMB2004	C	2	Unique		G	A.1	13	Uncertain	Chloroplast-localized LRR protein
At1g10910	EMB3103	C	1	Redundant		G	A.2	13	Unknown	Putative PPR protein
At1g11680	EMB1738	C		Unique		C	A.1	10.5	Obtusifoliol 14-Alpha Demethylase (CYP51)	Cytochrome P450 monooxygenase; Catalyzes sterol biosynthestic step upstream of FACKEL
At1g12260	EMB2749	NC		Redundant		G	B.2	7	NAM-Like Protein	NAC domain putative transcription factor
At1g12360	KEU	C		Redundant	ND	C	NA	11.3	Cytokinesis-Related Sec1 Protein	Regulator of vesicle trafficking; binds to cytokinesis-specific KN protein
At1g12410	EMB3146	C	4	Redundant		C	A.1	5	Chloroplast Clp Protease Proteolytic Subunit	None
At1g12770	EMB1586	C		Redundant		G	A.1	2.2	DEAD/DEAH Box RNA Helicase	RNA binding protein; potential target of gene silencing; putative role in trafficking of clathrin-coated vesicles
At1g13980	EMB30	C		Redundant		C	B.1	11.3	ARF Guanine Exchange Factor	Large membrane-associated ARF GEF; role in vesicle trafficking and cell polarity
At1g14610	TWN2	C		Redundant	EMG	C	A.3	3.2	Valyl tRNA Synthetase	Translation in mitochondria or cytoplasm
At1g15220	AtCCMH	NC		Unique		C	B.2	9	Mitochondrial Cytochrome C Maturation	Mitochondrial thiol-disulfide oxidoreductase
At1g17220	FUG1	NC	3	Redundant		NA	B.3	3.3	Chloroplast Translation Initiation Factor (cpIF2)	Chloroplast protein synthesis
At1g19080	TTN10	NC		Redundant		P	C.2	1	GINS Complex Subunit (PSF3)	Initiation of replication
At1g19800	TGD1	C	3	Unique	ND	C	NA	11.2	Chloroplast Envelope Protein	Putative component of a lipid transporter
At1g19850	MP	C		Redundant	ND	C	NA	7	B3 Domain Transcription Factor	Transcription of auxin-induced genes
At1g20050	HYD1	C		Unique		C	A.2	10.5	Sterol Isomerase	Catalyzes sterol biosynthetic step downstream of FACKEL
At1g20200	EMB2719	NC		Redundant	GEM	C	A.2	5	26S Proteasome Regulatory Subunit (RPN3)	Component of 26S proteasome lid
At1g20960	EMB1507	C		Redundant		G	A.1	2.3	Spliceosome-Associated RNA Helicase	Similar to human U5 200 kD splicing factor
At1g21310	RSH	C		Unique		C	A.3	11.1	Cell Wall Hydroxyproline-Rich Glycoprotein	Cell wall protein required for normal cell shape and correct positioning of the cell plate during cytokinesis
At1g21390	EMB2170	NC		Redundant		C	A.2	13	Unknown	None
At1g21690	EMB1968	C		Redundant		P ?	A.2	1	Replication Factor C	ATPase required for DNA polymerase loading
At1g21970	LEC1	C		Redundant		C	A.1	7	Transcriptional Regulator	HAP3 subunit of CCAAT-binding transcription factor
At1g22090	EMB2204	NC		Redundant		G	A.3	13	Unknown	None
At1g23400	AtCAF2	C	3	Redundant		T	A.2	2.3	Chloroplast Intron Splicing Factor	Splicing of plastid group II introns
At1g24340	EMB2421	NC		Unique		G	B.2	10.5	Polyketide Hydroxylase Related Monooxygenase	None
At1g24706	EMB2793	C		Unique		C	B.1	2.1	THO/TREX Complex Component (THO2)	Transcription elongation; mRNP biogenesis; genome integrity
At1g28300	LEC2	C		Redundant		C	A.2	7	B3 Domain Transcription Factor	B3 domain similar to ABI3, VP1, and FUS3
At1g30610	EMB2279	C	1	Redundant		G	B.1	2.2	PPR Protein	Processing of organellar mRNAs
At1g31860	HISN2	C	3	Unique	EMG	P	C.1/ A.3	10.1	Histidine Biosynthesis	Catalyzes the second step in histidine biosynthesis
At1g32490	EMB2733	NC		Redundant		G	A.3	2.3	RNA Helicase (Prp2)	Proposed role in pre-mRNA splicing
At1g34430	EMB3003	NC	4	Redundant		G / P	A.2	10.1	Dihydrolipoamide S-Acetyltransferase; Chloroplast Pyruvate Decarboxylase Complex; Putative E3 Binding Protein	Acetyl-CoA formation
At1g34550	EMB2756	NC		Redundant		T	C.3	13	Unknown	None
At1g36160	ACC1	C		Redundant	EMG	C	C.1	10.1	Acetyl-CoA Carboxylase	Formation of malonyl-CoA in fatty acid metabolism
At1g43170	EMB2207	C		Redundant		G	C.1	3.1	Ribosomal Protein L3	Translation in cytoplasm
At1g43710	EMB1075	NC		Unique	EMG	T	B.2	10.5	Serine Decarboxylase	Ethanolamine biosynthesis
At1g44900	MCM2	C		Redundant		P / Z	B.2	1	Putative DNA Helicase Subunit	DNA replication
At1g48175	EMB2191	C		Unique		P	A.2	2.3	tRNA Adenosine Deaminase	Catalytic (TAD2) subunit; Modification of wobble position
At1g48350	EMB3105	NC	4	Unique		G / P	NA	3.1	Chloroplast 50S Ribosomal Protein L18	Translation in chloroplast
At1g48850	EMB1144	NC	3	Unique	EMG	C	A.3	10.1	Chorismate Synthase	Aromatic amino acid biosynthesis
At1g49400	EMB1129	NC		Redundant		EG	A.3	3.1	Ribosomal Protein S17	Translation in cytoplasm
At1g49510	EMB1273	C	2	Unique		C	A.2	13	Unknown	None
At1g49770	RGE1	C		Unique		C	A.2	7	bHLH Protein	Regulation of transcription
At1g49880	EMB3106	C		Unique		G / P	A.2	12	Mitochondrial Sulfhydryl Oxidase	Disulfide bond formation
At1g50030	TOR	C		Redundant		EG	C.2	8	Protein Kinase (Target of Rapamycin)	Complexes with FKBP12 and rapamycin in yeast
At1g51450	TRAUCO	C		Unique	Marginal	G	B.2	7	Trithorax Class Transcriptional Regulator	Regulation of transcription
At1g53580	ETHE1	C		Unique	Marginal	T	B.2	12	Glyoxylate-Like Protein	Similar to human gene responsible for ethylmalonic encephalopathy
At1g55350	EMB1275	C		Unique		P	A.1	12	Calpain-Type Cysteine Protease	Similar to maize DEK1
At1g55600	MINI3	C		Redundant		C	B.1	7	WRKY Transcription Factor	Plant-specific DNA binding protein with autoregulatory function
At1g55870	AtPARN	C		Redundant		NA	B.1	2.3	CAF1 Family Ribonuclease	Poly (A) ribonuclease
At1g55900	EMB1860	C		Unique		P	B.2	4.2	Inner Mitochondrial Membrane Protein (Tim50)	Import of mitochondrial matrix proteins
At1g56200	EMB1303	C	5	Unique		C	A.1	13	Unknown	None
At1g58210	EMB1674	C		Redundant		C	A.2	13	Uncertain	Similar to kinase interacting protein (KIP1) of petunia
At1g59990	EMB3108	NC	2	Redundant		P ?	A.2	2.2	Putative RNA Helicase	None
At1g60170	EMB1220	NC		Redundant		C	NA	2.3	PRP31 Splicing Factor	Pre-mRNA processing (PRP) factor required for spliceosome assembly
At1g62360	STM	C		Redundant	ND	NA	NA	7	Knotted Class Homeodomain Protein	Regulation of shoot meristem formation
At1g62750	SCO1	C	4	Redundant		G	C.1	3.3	Plastid Elongation Factor G	Translation in chloroplasts
At1g63160	EMB2811	C		Redundant		P ?	B.1	1	DNA Replication Factor (RFC5)	DNA replication
At1g63700	YDA	C		Redundant		C	B.1	8	MAP3K Protein Kinase	Phosphorylation, signal transduction pathways
At1g64790	ILA	NC	1	Unique	ND	T	B.2	3.3	Translational Activator (GCN1)	Regulation of translation
At1g67320	EMB2813	C		Unique	EMG	P ?	B.2	1	DNA Polymerase Alpha (POLA3)	DNA replication
At1g67440	EMB1688	C		Redundant		C	A.2	13	Uncertain	Putative ribosome biogenesis GTPase
At1g67490	KNF	C		Redundant	EMG	C	A.3	4.1	Alpha Glucosidase I	Early step in N-glycan trimming of glycoproteins
At1g67630	EMB2814	C		Unique		P ?	A.2	1	DNA Polymerase Alpha (POLA2)	DNA replication
At1g67730	KCR1	C		Redundant		G	B.3	10.3	B-Ketoacyl-Coenzyme A Reductase	Long-chain fatty acid biosynthesis
At1g68730	AtZR1	NC		Unique	ND	NA	B.2	7	Zinc Finger Protein	Transcriptional regulation
At1g70070	ISE2	C		Redundant		C	A.1	2.2	DEAD Box Helicase	Putative RNA binding protein; Plasmodesmata function
At1g71440	PFI	C		Unique	ND	P	A.1	11.1	Tubulin Folding Cofactor E	Regulation of tubulin folding and microtubule dynamics
At1g74900	OTP43	C		Redundant		C	C.3	2.2	PPR Protein; Mitochondrial Splicing	Processing of organellar mRNAs
At1g74960	FAB1	C	4	Redundant		G / P	B.3	10.1	Ketoacyl-Acyl Carrier Protein Synthase	Elongation of 16:0-ACP to 18:0-ACP in the plastid
At1g74970	TWN3	NC	3	Unique		C	B.3	3.1	Ribosomal Protein S9	Translation in chloroplast
At1g75350	EMB2184	NC	4	Unique		T	B.2	3.1	Chloroplast Ribosomal Protein L31	Translation in chloroplast
At1g75660	XRN3	NC		Redundant	ND	NA	A.3	2.3	PTGS Suppressor	Nuclear degradation of aberrant RNAs
At1g76060	EMB1793	C		Unique		EG	B.2	13	Uncertain	Complex 1 LYR motif
At1g77470	EMB2810	C		Redundant		P ?	B.3	1	DNA Replication Factor (RFC5)	DNA replication
At1g78580	TPS1	C		Redundant		C	A.1	10.5	Trehalose-6-Phosphate Synthase 1	Catalyzes first step in trehalose biosynthesis
At1g78630	EMB1473	NC	4	Unique		G	C.3	3.1	Chloroplast Ribosomal Protein L13	Translation in chloroplast
At1g79230	STR1	C		Redundant		C	B.3	12	Mitochondrial Sulfurtransferase 1	None
At1g79350	EMB1135	NC		Unique		C	C.2	7	DNA-Binding Protein	Putative transcription factor
At1g79490	EMB2217	NC		Redundant		G	B.2	2.2	PPR Protein	Processing of organellar mRNAs
At1g79560	EMB1047	C	1	Redundant		G	A.3	5	Chloroplast FtsH-Like Protease	AAA ATPase protein
At1g79810	PEX2	C		Unique	ND	T	C.3	11.1	Peroxisomal Protein	Putative role in photomorphogenic pathway
At1g80070	SUS2	C		Redundant		G	A.1	2.3	PRP8 Splicing Factor	Pre-mRNA processing (PRP) factor and U5 snRNP component required for spliceosome function
At1g80260	EMB1427	C		Redundant		C	A.1	11.1	Gamma Tubulin (GCP5)	Microtubule nucleation
At1g80410	EMB2753	NC		Unique	EMG	G	B.2	4.1	N-Terminal Acetyltransferase	Proposed role in protein modification
At2g01350	QPT	C	2	Unique		G / P	A.1	10.1	NAD Biosynthesis	Catalyzes the third step in NAD biosynthesis from aspartate in plastids
At2g01390	EMB3111	C		Redundant		C	A.1	2.2	PPR Protein	Processing of organellar mRNAs
At2g01420	PIN4	C		Redundant	ND	C	A.1	8	Transmembrane Auxin Efflux Carrier	None
At2g01735	RIE1	C		Redundant		C	B.2	13	Uncertain	RING-H2 zinc finger protein
At2g01860	EMB975	C	1	Unique	ND	G	NA	2.2	PPR Protein	Processing of organellar mRNAs
At2g02150	EMB2794	NC		Redundant		C	A.2	2.2	Putative PPR Protein	Processing of organellar mRNAs
At2g03050	EMB93	C		Redundant		T	C.1	8	Plastid mTERF-Related Protein	Plastid signaling
At2g03150	EMB1579	C		Unique		C	A.1	13	Uncertain	Putative calcium binding protein
At2g03870	EMB2816	NC		Unique	EMG	G	A.3	2.3	snRNP; RNA Splicing (LSm7)	RNA processing
At2g04030	EMB1956	C	5	Redundant		T	C.2	4.1	Heat Shock Protein (Hsp90)	Molecular chaperone; Putative buffer against phenptypic effects of environmental stress and internal genetic variations
At2g04530	TRZ2	NC	3	Redundant		G	A.3	2.3	Plastid tRNA Biosynthesis	Cleavage of 3' end of tRNA precursor
At2g04842	EMB2761	NC		Redundant		G	C.2	3.2	Threonine tRNA Synthetase	Translation in mitochondria and chloroplasts
At2g17250	EMB2762	C		Unique		G	B.3	2.2	U3 SnoRNP	Proposed role in ribosome biogenesis
At2g17510	EMB2763	C		Redundant		EG	B.1	2.3	Ribonuclease II	Exosome component; Proposed role in ribosomal RNA processing
At2g18020	EMB2296	C		Redundant		G	C.1	3.1	Ribosomal Protein L8/L2	Translation in mitochondria or cytoplasm
At2g18290	EMB2783	C		Unique		Q	B.3/ A.3	5	Anaphase-Promoting Complex (APC10)	Ubiquitin protein ligase; Cell cycle control
At2g18390	TTN5	C		Redundant		P	A.1	11.1	ARL2 GTPase	Postulated to interact with TTN1 protein to regulate b-tubulin folding and microtubule dynamics
At2g18510	EMB2444	NC		Redundant		T	A.2	2.2	Spliceosome Associated Protein (SAP49)	RNA recognition motif (RRM) protein involved in post-transcriptional regulatory events
At2g19450	TAG1	C		Unique	ND	C	A.2	10.3	Diacylglycerol Transferase (DGAT)	Enzyme in Kennedy pathway of storage lipid biosynthesis
At2g20580	RPN1A	C		Redundant		G	A.2	5	26S Proteasome Subunit	Protein degradation and cell cycle progression
At2g21470	EMB2764	C		Redundant		P / EG	A.1	4.1	SUMO Activating Enzyme	Protein modification in the nucleus
At2g21710	EMB2219	C		Redundant		T	A.2	13	Uncertain	mTERF domain protein
At2g22870	EMB2001	C		Redundant		T	A.2	13	Uncertain	Putative ribosome biogenesis GTPase
At2g25660	EMB2410	C	2	Unique		G	A.1	13	Unknown	None
At2g25710	HCS1	C		Redundant	GEM	P	A.2	10.5	Holocarboxylase Synthetase	Biotin attachment to carboxylases and decarboxylases
At2g26060	EMB1345	C		Redundant		P	C.2	7	WD Repeat Protein (Ciao1)	Putative transcription factor binding protein
At2g26350	PEX10	C		Unique		T	A.2	11.1	Peroxisomal Protein	Membrane protein associated with peroxisomes
At2g26830	EMB1187	NC		Redundant		G	B.3	10.3	Choline Kinase	Enzyme in phospholipid (phosphatidylcholine) biosynthesis
At2g26890	GRV2	C		Unique	ND	NA	NA	11.3	DnaJ Domain Protein (RME-8)	Endocytosis; vacuolar sorting; protein trafficking
At2g27170	TTN7	C		Redundant		P	A.2	6.2	SMC3 Cohesin	Structural maintenance of chromosome (SMC) protein; chromosomal ATPase involved in sister chromatid cohesion and chromosome segregation in yeast and animal systems
At2g28000	SLP	C	5	Redundant		C	A.1	4.1	Chaperonin-60a	Protein folding in chloroplast; similar to prokaryotic groEL
At2g28880	EMB1997	NC	2	Redundant		EG	C.2	10.1	Bifunctional PABA Synthase; Glutamine Amidotransferase	Para-aminobenzoic acid biosynthesis
At2g30200	EMB3147	NC		Unique		P ?	A.2	10.1	ACP-S-Malonyltransferase	Fatty acid biosynthesis
At2g30410	KIS	C		Unique	ND	NA	A.1	11.1	Tubulin Folding Cofactor A	Regulation of tubulin folding and microtubule dynamics
At2g30920	EMB3002	NC		Unique		P / Z	C.2	9	Hexaprenyldihydroxybenzoate Methyltransferase	Ubiquinone biosynthesis
At2g31060	EMB2785	C		Redundant		G	B.2	7	E2Fa Transcriptional Activator	Cell Cycle Control
At2g31305	INH3	C		Unique		G	A.1	8	Protein Phosphatase 1 Regulatory Subunit	None
At2g31340	EMB1381	C		Unique		T	B.2	13	Unknown	None
At2g31530	EMB2289	C		Redundant		G	A.3	4.2	Chloroplast Protein Translocase (SECY2)	Translocation of nuclear-encoded proteins; cotranslational membrane protein translocation and insertion in chloroplasts
At2g32590	EMB2795	C		Unique		P	B.3/C.2	6.2	Non-SMC Condensin Complex Subunit H	Sister chromatid segregation in mitosis
At2g33800	EMB3113	C	4	Unique		P ?	C.2/ A.3	3.1	Chloroplast 30S Ribosomal Protein S5	Translation in chloroplast
At2g34650	PID	C		Redundant	ND	C	A.1	8	Serine-Threonine Protein Kinase	Postulated to function as a positive regulator of polar auxin transport
At2g34780	EMB1611	C		Unique		P	C.3	13	Uncertain	Putative role in promoting cell division
At2g35650	CSLA7	C		Redundant	EMG	G	C.2	10.4	Cellulose Synthase-Like Glycosyltransferase	Synthesis of cell wall polysaccharides
At2g36000	EMB3114	NC	1	Redundant		G	C.2	13	Uncertain	mTERF domain protein
At2g36230	HISN3	C	1	Unique	EMG	P	A.2	10.1	Histidine Biosynthesis	Catalyzes the third step in histidine biosynthesis
At2g37560	ORC2	C		Unique		G	C.2	1	Origin Recognition Complex Subunit 2	DNA replication, chromatin structure, gene silencing
At2g37920	EMB1513	NC		Unique		T	A.2	13	Unknown	None
At2g38020	VCL1	C		Unique		Q	B.2	11.3	Vacuolar Protein Sorting (Vps16)	Required for vacuole biogenesis and protein trafficking to the vacuole
At2g38280	FAC1	C		Unique		P / Z	NA	10.1	AMP Deaminase	Purine biosynthesis
At2g38670	PECT1	C		Unique		P	A.3	10.5	Phosphatidylethanolamine Biosynthesis	Rate-limiting enzyme in the CDP-Etn pathway of PE biosynthesis
At2g38770	EMB2765	C		Unique		G	A.2	2.3	U5 Associated Protein (Aquarius)	Proposed role in pre-mRNA splicing
At2g39080	EMB2799	NC	4	Unique		C	A.2	13	Unknown	Potential role in chloroplast nutrient transport
At2g39770	CYT1	C		Redundant		C	C.1	10.1	Mannose-1-Phosphate Guanyltransferase; GDP-Mannose Pyrophosphorylase	Catalyzes the production of GDP-mannose; required for N-glycosylation and vitamin C biosynthesis
At2g41350	EMB2819	NC		Unique	EMG	NA	C.3	11.1	HAUS1 Subunit of Augmin Complex	Mitotic spindle formation
At2g41500	EMB2776	C		Redundant	GAM	Q	B.1	2.3	U4/U6 snRNP (Prp4)	Proposed role in pre-mRNA splicing
At2g41720	EMB2654	NC		Redundant		G	C.2	2.2	PPR Protein	Processing of organellar mRNAs
At2g43360	BIO2	C		Unique		G	A.1	10.1	Biotin Synthase	Catalyzes the final step in biotin synthesis within the mitochondrion
At2g43650	EMB2777	NC		Redundant		C	C.2	2.3	U3 snoRNP (Utp3); Processome Small Subunit	Putative regulator of chromatin silencing
At2g44190	EMB3116	C		Redundant		G / P	A.1	11.1	Novel Microtubule Associated Protein	Endosperm nuclear division and cellularization
At2g45000	EMB2766	C		Unique		C	C.3	11.3	COPII Coat Protein (Sec31)	Putative chloroplast-localized vesicular trafficking protein
At2g45270	GCP1	C		Unique		G	A.3	12	Mitochondrial Glycoprotease	HSP70 superfamily protein
At2g45330	EMB1067	C		Redundant		G	A.2	2.3	2' tRNA Phosphotransferase	Catalytic role in tRNA splicing
At2g45690	SSE	C		Unique	ND	C	NA	11.1	Peroxisomal Biogenesis Factor (Pex16)	Required for protein and oil body biogenesis
At2g47620	AtSWI3A	C		Redundant	EMG	EG	A.1	6.1	DNA Binding Protein	Subunit of SWI/SNF chromatin remodeling complex
At2g47940	EMB3117	NC	4	Redundant		P ?	A.2	5	Chloroplast DegP2 Protease	Cleaves D1 protein
At3g01370	AtCFM2	C	1	Redundant	ND	NA	B.2	2.3	Chloroplast Intron Splicing Factor	Splicing of plastid group II introns
At3g01610	EMB1354	NC		Redundant		P / EG	A.2	12	AAA ATPase (CD48C)	Putative cell division control protein
At3g02280	ATR3	C		Redundant		P	A.1	12	Cytochrome P450 Reductase Like	NR1 subfamily of diflavin reductases
At3g02660	EMB2768	C	4	Unique	EMG	P / Z	A.1	3.2	Tyrosine tRNA Synthetase	Translation in mitochondria and chloroplasts
At3g04340	EMB2458	C	4	Redundant		G	A.2	5	FtsH Protease (AAA ATPase)	Chloroplast ATP-dependent zinc metalloprotease
At3g04400	EMB2171	NC		Redundant		G	A.3	3.1	Ribosomal Protein L17/L23	Translation in mitochondria or cytoplasm
At3g04460	PEX12	C		Unique		T	B.2	11.1	Peroxisomal Protein	RING finger protein required for peroxisome biogenesis
At3g04680	CLPS3	C		Redundant	EMG	P	C.3	2.3	Polyadenylation Factor	mRNA 3' end processing
At3g04790	EMB3119	C	4	Redundant		P ?	A.2	10.4	Ribulose-5-Phosphate Isomerase	Carbohydrate metabolism
At3g05680	EMB2016	C		Unique		G	B.1	13	Unknown	None
At3g06350	EMB3004	C	3	Unique		C	A.1	10.1	Dehydroquinate Dehydratase; Shikimate Dehydrogenase	Chorismate biosynthesis
At3g06430	EMB2750	C	1	Redundant		G	A.1	2.2	PPR Protein	Processing of organellar mRNAs
At3g07060	EMB1974	C		Unique		C	B.3	13	Unknown	None
At3g07430	EMB1990	C	2	Redundant		C	A.2	13	Uncertain	Integral membrane, chloroplast division protein
At3g08850	RAPTOR1	C		Redundant		P / Z	B.2	8	Binding Partner of Target of Rapamycin (TOR) Kinase	Signal transduction
At3g10220	EMB2804	C		Unique		P	B.3	11.1	Tubulin Folding Cofactor B	Microtubule polymerization
At3g10670	AtNAP7	C	4	Unique		G	C.3	12	Plastidic SufC-Like ABC/ATPase	Fe-S cluster maintenance and repair
At3g10690	AtGYRA	C	4	Unique	ND	C	A.2	1	DNA Gyrase Subunit A	Replication and transcription in chloroplasts and mitochondria
At3g11940	AML1	C		Redundant	GEM	G	C.2	3.1	Ribosomal Protein S5	Translation in cytoplasm
At3g12080	EMB2738	C	4	Redundant		G	B.3	13	Uncertain	Putative ribosome biogenesis GTPase (EngA)
At3g12670	EMB2742	C		Redundant		G	A.3	10.1	CTP Synthase (UTP-Ammonia Ligase)	Ribonucleotide metabolism
At3g13200	EMB2769	NC		Unique		G	B.3	2.3	U5 Associated Protein (Cwc15)	Proposed role in pre-mRNA splicing
At3g14900	EMB3120	C	2	Unique		T	A.1	13	Unknown	None
At3g16290	EMB2083	C	4	Redundant		T	A.1	5	FtsH Protease (AAA ATPase)	Chloroplast ATP-dependent zinc metalloprotease
At3g17300	EMB2786	C		Unique		P ?	C.3	13	Unknown	Complex 1 (LYR domain) protein
At3g17910	EMB3121	C		Redundant		C	A.3	9	Cytochrome C Oxidase Assembly in Mitochondria	Electron transport
At3g18110	EMB1270	C		Redundant		C	B.1	2.2	PPR Protein	Processing of organellar mRNAs
At3g18290	EMB2454	C	1	Redundant		P / EG	A.3	7	Zinc Finger Protein	Putative role in transcriptional regulation
At3g18390	EMB1865	C	2	Redundant		G	A.2	2.3	Chloroplast Splicing Factor (CFM1)	Splicing of group II introns in chloroplasts
At3g19700	IKU2	C		Redundant		C	A.2	8	LRR Kinase	Leucine-rich repeat receptor kinase
At3g19770	AtVPS9A	C		Redundant		C	NA	11.3	Rab5 Guanine Exchange Factor	Proposed role in endocytosis; regulator of Rab5 GTPase
At3g19980	EMB2736	NC		Redundant		G	A.3	8	Serine/Threonine Protein Phosphatase 6	Similar to yeast SIT4, PPE1; Putative role in cell cycle control
At3g20070	TTN9	C		Unique		P	A.2	13	Unknown	None
At3g20400	EMB2743	NC		Unique		C	C.3	13	Uncertain	Potential F box protein
At3g20440	EMB2729	C	2	Redundant		T	A.3	10.4	1,4-alpha-glucan branching enzyme	Similar to starch branching enzyme
At3g20630	TTN6	C		Unique		G	A.1	5	UBP14 Deubiquitinating Enzyme	Isopeptidase T class deubiquitinating enzyme required for ubiquitin processing and recycling
At3g23110	EMB2800	NC		Redundant		C	A.2	8	LRR Protein (AtRLP37)	Putative signaling function
At3g24560	RSY3	C		Unique	ND	G	C.2	13	Uncertain	ATP binding motif
At3g25860	PLE2	C	4	Redundant		T	B.2	10.1	Chloroplast Pyruvate Decarboxylase E2 Subunit	Acetyl-CoA formation in plastids
At3g26790	FUS3	C		Redundant		C	B.3	7	B3 Domain Transcription Factor	Regulator of gene expression during late embryogenesis
At3g27670	RST1	C		Unique	ND	C	A.1	13	Unknown	Cuticular wax formation
At3g27750	EMB3123	C	2	Unique		C	A.1	13	Uncertain	VPS9 domain protein
At3g29290	EMB2076	NC		Unique		T	B.2	2.2	PPR Protein	Processing of organellar mRNAs
At3g44530	HIRA	C		Redundant	ND	NA	A.3	6.1	Chromatin Remodeling Factor	Putative histone chaperone
At3g46560	EMB2474	NC		Unique		P / EG	C.2	4.2	Small Zinc Finger Protein	Similar to mitochondrial inner membrane translocase (TIM9)
At3g46740	TOC75	C	4	Redundant		P / Z	A.1	4.2	Chloroplast Import Protein	Protein translocation channel in plastid outer envelope membrane
At3g48110	EDD	C	5	Unique		G	A.1	3.2	Glycine tRNA Synthetase	Translation in chloroplast
At3g48470	EMB2423	C		Unique		EG	A.1	13	Uncertain	Weak similarity to telomere maintenance protein (Telo2)
At3g48930	EMB1080	NC		Redundant	EMG	G	B.2	3.1	Ribosomal Protein S11	Translation in cytoplasm
At3g49170	EMB2261	C	1	Redundant		C	A.1	2.2	PPR Protein	Processing of organellar mRNAs
At3g49240	EMB1796	C	1	Redundant		G	C.2	2.2	PPR Protein	Processing of organellar mRNAs
At3g49660	AtMUT11	NC		Redundant	ND	NA	NA	6.1	Subunit of Histone Methyltransferase Complex	Gene silencing; Heterochromatin maintenance
At3g50870	MNP	C		Redundant		C	NA	7	GATA Factor Transcriptional Regulator	Regulation of transcription
At3g52590	EMB2167	C		Redundant	GEM/EMG	G	B.2	12	Ubiquitin Fused to Ribosomal Protein L40 (UbA52)	Ubiquitin ribosomal fusion protein
At3g52940	FK	C		Redundant	ND	C	NA	10.5	Sterol C-14 Reductase	Sterol biosynthesis during embryo development; functions upstream of STE1/DWF7 in biosynthetic pathway
At3g54010	PAS1	C		Redundant		C	B.2	8	Immunophilin-like FK506 Binding Protein	Postulated to function in hormone signalling pathways
At3g54170	FIP37	C		Unique		G	B.3	2.3	FKBP12 Interacting Protein	Putative role in alternative pre-mRNA splicing
At3g54320	WRI1	C		Redundant	ND	C	A.3	7	Transcription Factor	AP2/EREB domain protein; regulator of storage compound biosynthesis
At3g54350	EMB1967	C		Redundant		T	C.2	8	Forkhead-Associated (FHA) Domain Protein	Contains phosphoprotein-binding domain; putative role in signal transduction pathways
At3g54660	EMB2360	C	4	Redundant		G	A.2	12	Chloroplast Glutathione Reductase	Protection against oxidative stress
At3g54670	TTN8	C		Redundant		P	A.1	6.2	SMC1 Cohesin	Structural maintenance of chromosome (SMC) protein; chromosomal ATPase involved in sister chromatid cohesion and chromosome segregation in yeast and animal systems
At3g54720	AMP1	C		Redundant	ND	C	C.2	8	Putative Glutamate Carboxypeptidase	Similar to N-acetyl a-linked acidic dipeptidase (NAALADase); Potential signaling function related to MP
At3g55010	EMB2818	C	4	Unique		P ?	B.3	10.1	Phosphoribosylformylglycinamidine Cyclo-ligase (PUR5)	AIR synthetase; Purine biosynthesis
At3g55510	RBL	NC		Redundant	ND	T	C.2	13	Uncertain	Noc2 domain protein
At3g55610	P5CS2	C	2	Redundant	ND	C	C.2	10.1	Proline Biosynthesis	Delta 1-pyrroline-5-carboxylate synthetase
At3g55620	EMB1624	NC		Redundant		G	A.2	3.3	Translation Initiation Factor (EIF-6)	Regulation of translation
At3g57870	EMB1637	C		Unique	EMG	T	A.1	4.1	SUMO Conjugating Enzyme (SCE1)	Protein modification; Putative role in stress response, cell cycle control
At3g60740	TTN1	C		Unique		P	A.2	11.1	Tubulin Folding Cofactor D	Postulated to interact with TTN5 protein to regulate B-tubulin folding and microtubule dynamics
At3g60830	ARP7	C		Redundant		C	A.2	6.1	Actin-Related Protein	Proposed role in chromatin remodeling
At3g61780	EMB1703	C	1	Redundant		T	B.1	13	Unknown	None
At3g63490	EMB3126	C	4	Redundant		G / P	A.1	3.1	Chloroplast 50S Ribosomal Protein L1	Translation in chloroplast
At4g00220	JLO	C		Redundant		G	A.1	7	LOB domain protein	Transcription Factor
At4g00620	EMB3127	C	4	Redundant		P ?	A.1	10.1	Folic Acid Biosynthesis	Vitamin biosynthesis
At4g02060	PRL	C		Redundant	EMG	G	A.3	1	DNA Replication Licensing Factor	Regulation of initiation of DNA replication; homolog of yeast and mammalian MCM7 protein
At4g02570	AXR6	C		Redundant	EMG	P / Z	A.2	5	Cullin 1 Protein	Component of SCF ubiquitin ligase complex
At4g02790	EMB3129	C	1	Unique		G	A.2	13	Uncertain	Putative ribosome biogenesis GTPase
At4g02980	ABP1	C		Unique		G	A.2	8	Auxin Binding Protein 1	Mediates auxin-induced cell elongation and cell division during embryogenesis
At4g03240	AtFH	C		Unique		P / Z	A.3	12	Frataxin	Required for biogenesis of mitochondrial Fe-S proteins
At4g03430	EMB2770	C		Redundant		T	A.1	2.3	U5 snRNP (Prp6)	Proposed role in pre-mRNA splicing
At4g04350	EMB2369	C	5	Unique		G	A.1	3.2	Leucine tRNA Synthetase	Translation in chloroplast
At4g05410	YAO	C		Redundant	EMG	P / Z	B.2	2.2	snoRNP Protein	rRNA biogenesis
At4g09980	EMB1691	C		Unique		G	A.1	6.1	DNA Methyltransferase	DNA methylation; chromatin structure
At4g10760	EMB1706	C		Unique		G	A.1	2.3	Methyltransferase MT-A70	Adenine methylation in pre-mRNAs
At4g11150	EMB2448	C		Redundant		G	A.1	11.2	Vacuolar H+ ATPase (VHA-E1)	Vacuolar proton pump component
At4g13750	EMB2597	C		Redundant		C	A.2	13	Uncertain	Plant-specific nuclear protein
At4g13940	EMB1395	C		Redundant		G	A.1	10.1	S-Adenosyl Homocysteine Hydrolase	Amino acid and nucleotide metabolism; Indirect role in gene silencing
At4g14590	EMB2739	NC		Unique		G	A.2	13	Uncertain	Potential role in snRNA 3' end formation (Integrator complex)
At4g16370	OPT3	C		Redundant		P	B.2	4.2	Oligopeptide Transporter	Transport of oligopeptides across cell membrane
At4g19350	EMB3006	NC		Unique		EG	A.3	13	Unknown	None
At4g20060	EMB1895	C		Unique		G	C.1	13	Unknown	None
At4g20090	EMB1025	C	1	Redundant		C	A.1	2.2	PPR Protein	Processing of organellar mRNAs
At4g20740	EMB3131	C	1	Redundant		C	A.1	2.2	PPR Protein	Processing of organellar mRNAs
At4g21130	EMB2271	NC		Redundant		C	C.3	2.3	WD-40 Repeat; U3 snoRNP Associated Protein	Ribosome biogenesis; pre-rRNA processing
At4g21190	EMB1417	C		Redundant		G	A.3	10.5	5' Adenylsulfate Reductase (APR3)	Sulfate reduction
At4g21710	EMB1989	C		Redundant	GAM	P / EG	A.2	2.1	RNA Polymerase II Subunit	Transcription
At4g21800	QQT2	C		Unique		P	C.3	11.1	ATP/GTP Binding Protein	Proposed role in microtubule localization
At4g22970	AESP	C		Redundant		G	A.2	6.2	Separase	Separation of sister chromatids
At4g23100	RML1	C	4	Unique		C	B.1	10.5	Gamma-Glutamylcysteine Synthetase	First enzyme in glutathione biosynthesis; required for initiation and maintenance of cell division
At4g23250	EMB1290	NC		Redundant		C	B.3	8	Protein Kinase	Serine-Threonine protein kinase
At4g23430	TIC32	C	1	Redundant	ND	T	B.3	4.2	Subunit of Tic Complex; Short chain dehydrogenase	Chloroplast protein import
At4g23660	AtPPT1	NC		Unique		T	C.3	9	Ubiquinone Biosynthesis	4-Hydroxybenzoate polyprenyl diphosphate transferase
At4g24270	EMB140	NC		Unique		G	A.2	13	Uncertain	RNA recognition motif protein
At4g26300	EMB1027	NC	4	Redundant		G	A.2	3.2	Arginine tRNA Synthetase	Translation in chloroplast
At4g26500	EMB1374	C	5	Unique		EG	B.1	12	Activator of Plastidic and Mitochondrial Desulfurases (AtSufE)	Fe-S cluster protein
At4g26900	HISN4	C	4	Unique	EMG	P	A.1	10.1	Histidine Biosynthesis	Catalyzes the fourth step in histidine biosynthesis
At4g27010	EMB2788	C		Redundant		C	A.1	13	Uncertain	Weak similarity to ribosome biogenesis factor (URB1)
At4g28210	EMB1923	C	2	Unique		C	A.1	13	Unknown	None
At4g29060	EMB2726	C	4	Unique		G	C.1	3.3	Translation Elongation Factor Ts	Translation in chloroplast
At4g29660	EMB2752	NC		Unique		C	A.3	13	Unknown	None
At4g29860	EMB2757	C		Unique		C	B.2	13	Uncertain	WD-40 repeat protein
At4g29910	EMB2798	NC		Unique		P ?	A.2	1	Origin of Replication Complex (ORC5)	Initiation of DNA replication
At4g30580	EMB1995	C	4	Unique		C	B.1	10.3	Lysophosphatidic Acid Acyltransferase (LPAAT)	Fatty acid and phospholipid metabolism
At4g31160	DCAF1	C		Unique		G	A.1	5	Nuclear Ubiquitin E3 Ligase	Protein degradation
At4g31770	DBR1	C		Unique		C	A.3	2.3	Lariat Debranching Enzyme	Removal of spliced introns; generation of snoRNAs
At4g31780	EMB2797	C	5	Redundant		G	A.2	10.3	MGDG (Galactolipid) Synthesis	Monogalactosyldiacylglycerol biosynthesis
At4g32400	EMB104	C	3	Redundant		G	C.1	11.2	Transport Protein (SHS1/AtBT1)	Plastid nucleotide export
At4g32410	RSW1	C		Redundant	GAM	C	NA	10.4	Cellulose Synthase	Cellulose biosynthesis; Primary cell wall formation
At4g32720	AtLA1	C		Redundant		G	C.1	2.2	RNA Binding Protein	RNA maturation and stability in nucleus
At4g33090	APM1	C		Unique	ND	C	A.2	12	Bifunctional M1 Aminopeptidase	Proposed role in cellular trafficking
At4g33460	EMB2751	NC	2	Unique		C	C.2	11.2	ABC Transporter	Proposed role in membrane transport
At4g33495	RPD1	C		Redundant	ND	T	A.2	2.3	PORR Domain Protein	Probable role in organellar RNA splicing or metabolism
At4g33680	AGD2	C	4	Redundant		P	A.2	10.1	Class 2 Aminotransferase	Amino acid metabolism
At4g33990	EMB2758	NC		Redundant		G	B.2	2.2	PPR Protein	Processing of organellar mRNAs
At4g34620	SSR16	C	4	Redundant		T	A.2	3.1	Mitochondrial Ribosomal Protein S16	Translation in mitochondria and chloroplasts
At4g36480	EMB2779	NC		Redundant	GAM	P ?	A.2	10.3	Serine Palmitoyltransferase (LCB1 Subunit)	Catalyzes the first step of sphingolipid biosynthesis
At4g36630	EMB2754	NC		Unique		C	A.2	11.3	Putative Vacuolar Protein (VPS39)	Proposed role in vacuolar protein sorting
At4g39120	IMPL2	C	4	Unique		EG	A.1	10.1	Histidinol-Phosphate Phosphatase	Histidine biosynthesis
At4g39620	EMB2453	C		Redundant		G	A.2	2.2	PPR Protein	Processing of organellar mRNAs
At4g39920	POR	C		Unique	ND	P	NA	11.1	Tubulin Folding Cofactor C	Regulation of tubulin folding and microtubule dynamics
At5g02190	AtASP38	C		Redundant	EMG	T	A.2	5	Aspartic Protease	None
At5g02250	EMB2730	C	3	Unique		C	B.1	2.3	Ribonuclease II Family Protein	3' to 5' exoribonuclease; Maturation of chloroplast rRNAs
At5g03800	EMB1899	C	1	Redundant		G	A.1	2.2	PPR Protein	Processing of organellar mRNAs
At5g05560	EMB2771	NC		Unique		C	A.2	6.2	E3 Ubiquitin Ligase (APC1)	Anaphase promoting complex 1; cell cycle regulation
At5g05680	EMB2789	C		Unique		EG	B.2	4.2	Nuclear Envelope Protein (Nup88)	Nuclear protein export
At5g06240	EMB2735	NC		Unique		C	A.3	13	Unknown	None
At5g07280	EXS	C		Redundant		C	A.2	8	LRR Receptor Kinase	Signal transduction pathway component
At5g07500	PEI	C		Redundant	ND	C	NA	7	Zinc Finger Transcriptional Regulator	Embryo-specific transcription factor
At5g08130	BIM1	NC		Redundant	ND	C	C.2	7	bHLH Protein Interactor of Transcription Factors	Brassinosteroid signaling
At5g08170	EMB1873	C		Unique		C	B.1	10.5	Agmatine Iminohydrolase	Polyamine biosynthesis
At5g08470	EMB2817	C		Redundant	EMG	P ?	B.2	11.1	AAA ATPase (PEX1)	Peroxisome biogenesis
At5g09900	EMB2107	C		Redundant		C	NA	5	26S Proteasome Regulatory Subunit (RPN5)	Component of 26S proteasome lid
At5g10330	HISN6A	C	1	Redundant		P	A.1	10.1	Histidinol Phosphate Aminotransferase	Histidine biosynthesis
At5g10480	PAS2	C		Unique	ND	C	C.3	10.3	3-Hydroxy-Acyl-CoA Dehydratase	Very-long-chain fatty acid biosynthesis
At5g11890	EMB3135	NC	1	Redundant		C	B.2	13	Unknown	None
At5g13010	EMB3011	C		Redundant		P	B.2	2.3	RNA Helicase	Similar to pre-mRNA splicing factor PRP16
At5g13480	FY	C		Unique		P / Z	A.2	2.3	Nuclear RNA Binding Protein	Highly conserved polyadenylation factor
At5g13510	EMB3136	NC	4	Redundant		G / P	NA	3.1	Chloroplast 50S Ribosomal Protein L10	Translation in chloroplast
At5g13690	CYL1	C		Unique		P / Z	NA	10.4	Alpha-N-Acetyl-Glucosaminidase (NAGLU)	Arabinogalactan protein metabolism
At5g13710	SMT1	C		Redundant		C	C.1	10.5	Sterol Methyltransferase (Yeast Erg6p)	Sterol biosynthesis; modulation of cholesterol levels
At5g14170	EMB262	NC		Redundant		C	A.3	6.1	Chromodomain Remodeling Complex (CHC1)	Chromatin modification
At5g14320	EMB3137	C	5	Unique		G / P	A.3	3.1	Chloroplast 30S Ribosomal Protein S13	Translation in chloroplast
At5g14760	AO	C	4	Redundant		G / P	C.2	10.1	NAD Biosynthesis	Catalyzes the first step in NAD biosynthesis from aspartate in plastids
At5g14800	EMB2772	C		Unique		P	A.2	10.1	Proline Biosynthesis	Catalyzes final step in proline biosynthesis from glutamate and ornithine
At5g15540	EMB2773	C		Unique		P	A.1	6.2	Adherin (AtSCC2)	Sister chromatid cohesion
At5g15920	EMB2782	C		Unique		P	B.1	6.2	SMC Family Protein (MSS2)	Chromosome dynamics (SMC5)
At5g16390	CAC1A	C	4	Redundant	EMG	T	NA	10.1	Biotin Carboxyl Carrier Protein	Acetyl-CoA carboxylase subunit; Fatty acid biosynthesis
At5g16715	EMB2247	C	4	Redundant		G	A.1	3.2	Valine tRNA Synthetase	Translation in chloroplast
At5g16750	TOZ	C		Redundant	EMG	P / EG	NA	13	Uncertain	Nucleolar WD-40 repeat protein
At5g17710	EMB1241	C	3	Redundant		P / EG	C.3	4.1	Chloroplast GrpE Protein	Interacts with Hsp70; Chloroplast protein maintenance
At5g18570	EMB3138	C	4	Redundant		G / P	A.1	11.3	Chloroplast Obg-Like GTPase	Thylakoid biogenesis
At5g18580	FS1	C		Unique	ND	C	NA	8	Protein Phosphatase (PP2A)	Intracellular signal transduction pathways
At5g18700	EMB3013	NC		Redundant	EMG	C	C.3	11.1	Microtubule-Associated Kinase	Cell plate expansion in cytokinesis
At5g18820	EMB3007	NC	1	Redundant		G	C.3	4.1	Chaperonin	Similar to pea chloroplast 60 kDa alpha subunit
At5g19620	OEP80	C	3	Redundant		G	B.3	4.2	Chloroplast Outer Envelope Protein	Chloroplast protein import and/or biogenesis
At5g19820	EMB2734	C		Redundant		C	B.2	4.2	Karyopherin Beta 3 Transportin	Nuclear import of ribosomal proteins
At5g20920	EMB1401	NC		Redundant		C	A.2	3.3	Translation Initiation Factor (EIF-2 Beta)	Attachment of ribosome small subunit in translation
At5g21140	EMB1379	C		Unique		EG	A.3	13	Uncertain	Weak similarity to DNA repair protein (Nse1)
At5g22010	AtRFC1	C		Unique	ND	NA	C.1	1	Replication Factor C Large Subunit	DNA replication and repair
At5g22110	CYL2	C		Unique	Marginal	G	A.2	1	DNA Polymerase Epsilon, Subunit	DNA replication
At5g22130	PNT1	C		Unique	GEM	C	A.2	10.5	ER-Localized Mannosyl Transferase	Production of GPI anchor; Proposed role in cell wall biogenesis
At5g22370	EMB1705	C		Redundant		P	A.3	11.1	GPN-Loop GTPase 2	Microtubule organization
At5g22640	EMB1211	C	1	Unique		C	B.1	13	Uncertain	MORN repeat protein
At5g22800	EMB1030	C	4	Redundant		T	A.2	3.2	Alanine tRNA Synthetase	Translation in mitochondria and chloroplasts
At5g23880	EMB1265	NC		Redundant		P / EG	B.3	2.3	Cleavage and Polyadenylation Specificity Factor	Role in mRNA cleavage and polyadenylation
At5g23940	EMB3009	NC		Redundant		G	B.3	10.5	BAHD Transferase Family	Modification of secondary metabolites
At5g24400	EMB2024	NC	4	Redundant		C	A.3	10.5	6-Phosphogluconolactonase	Role in pentose phosphate pathway
At5g24670	EMB2820	C		Unique		P	A.2	2.3	Adenosine Deaminase (TAD3)	Modification of wobble position of tRNA
At5g26742	EMB1138	NC	4	Redundant		G	A.2	2.2	DEAD/DEAH Box RNA Helicase	RNA binding protein; potential role in gene silencing during development
At5g27270	EMB976	NC	1	Redundant	ND	C	NA	2.2	PPR Protein	Processing of organellar mRNAs
At5g27540	EMB2473	C		Redundant	EMG	P / Z	C.2	12	Mitochondrial GTPase	Regulation of mitochondrial morphology
At5g27720	EMB1644	C		Unique		G	A.1	2.3	U6 snRNA Associated Protein (LSm4)	Component of spliceosome involved in pre-mRNA splicing
At5g27740	EMB2775	C		Unique		P / EG	A.1	1	DNA Replication Factor (RFC3)	PCNA loading complex factor
At5g37510	EMB1467	NC		Unique	EMG	C	C.2	9	Mitochondrial NADH Dehydrogenase	Role in electron transfer chain
At5g37630	EMB2656	C		Unique		EG	A.3	6.2	Chromosome Condensation	Similar to condensin subunit (XCAP-G)
At5g39680	EMB2744	NC		Redundant		G	A.2	2.2	PPR Protein	Similar to putative selenium binding protein
At5g39710	EMB2745	NC		Redundant		C	A.2	2.2	PPR Protein	Processing of organellar mRNAs
At5g39750	EMB3008	NC		Redundant	EMG	P	A.3	7	MADS-Box Family Protein	Putative transcription factor
At5g39980	EMB3140	C	1	Redundant		Q	A.1	2.2	PPR Protein	Processing of organellar mRNAs
At5g40160	EMB506	C	4	Redundant		G	B.3	13	Uncertain	Ankyrin repeat protein
At5g40480	EMB3012	NC		Unique	EMG	P	B.3	4.2	Nuclear Pore Complex Protein (Nup210)	Nuclear protein export
At5g41480	GLA1	C		Redundant		EG	B.1	10.1	Dihydrofolate Synthetase	Folate biosynthesis
At5g42080	ADL1A	C		Redundant		C	A.1	11.3	Dynamin-Like Protein	Associated with cell plate; similar to phragmoplastin; postulated to function in vesicular trafficking and cytokinesis
At5g48230	EMB1276	C		Redundant	EMG	EG	A.2	10.5	Acetyl CoA Acetyl Transferase (Thiolase)	Fatty acid oxidation
At5g48600	SMC4	C		Redundant	GEM	G	A.3	6.2	Condensin	AtCAP-C condensin; chromatin condensation
At5g48840	PTS	C		Unique		P	B.2	10.1	Pantothenate Synthetase	Biosynthesis of vitamin B5; Coenzyme A (CoA) function
At5g49010	EMB2812	NC		Unique		NA	A.3	1	DNA Replication, GINS Complex (SLD5)	DNA replication
At5g49930	EMB1441	C		Unique		G	A.1	13	Uncertain	Putative RNA binding protein (Human SDCCAG1)
At5g50210	QS	C	4	Redundant		G / P	A.2	10.1	NAD Biosynthesis	Catalyzes the second step in NAD biosynthesis from aspartate in plastids
At5g50280	EMB1006	NC	1	Redundant		G	A.2	2.2	PPR Protein	Processing of organellar mRNAs
At5g50390	EMB3141	NC	1	Redundant		P ?	A.2	2.2	PPR Protein	Processing of organellar mRNAs
At5g50850	MAB1	NC		Redundant	ND	NA	NA	10.5	Mitochondrial PDH-E1 Beta	Pyruvate dehydrogenase E1 beta subunit
At5g50960	AtNBP35	C		Redundant		G / P	A.1	12	Cytosolic Iron–Sulfur Cluster Assembly and Delivery	None
At5g51020	CRL	C	4	Unique		C	A.2	12	Plastid Outer Envelope Membrane Protein	Required for plastid division
At5g51200	EMB3142	NC		Unique		P ?	NA	4.2	Nuclear Pore Complex Protein (Nup205)	Nuclear protein export
At5g51430	EYE	C		Unique		C	A.3	11.1	Subunit of Golgi (COG) Complex	Proposed role in formation of extracellular matrix
At5g52920	PKP1	C	4	Redundant		C	A.2	10.3	Plastidic Pyruvate Kinase B1 Subunit	Seed oil biosynthesis
At5g53400	BOB1	C		Redundant		G	A.1	4.1	Noncanonical Small Heat Shock Protein (NudC)	Putative molecular chaperone
At5g53860	EMB2737	C	1	Unique		C	A.3	13	Unknown	Putative auxin-regulated protein
At5g55940	EMB2731	NC		Unique	EMG	C	A.2	2.3	Processome Protein (NOC4)	Biogenesis of 18S rRNA
At5g56290	EMB2790	C		Unique		G	A.1	11.1	Peroxisome Targeting	Peroxisomal protein translocation
At5g56680	EMB2755	NC		Redundant		C	C.2	3.2	Asparaginyl-tRNA Synthetase	Translation in cytoplasm
At5g56930	EMB1789	C		Unique		G	A.1	13	Uncertain	Putative zinc finger domain
At5g57590	BIO1	C		Unique		C	B.2	10.1	7-KAP, DAP Aminotransferase; Dethiobiotin Synthetase	Biotin synthesis in mitochondria; Bifunctional (BIO3-BIO1) protein
At5g57930	EMB1629	C	1	Redundant		G	B.1	12	Accumulation of Iron-Sulfur Complexes in Chloroplasts	None
At5g58250	EMB3143	NC	4	Unique		C	NA	13	Unknown	None
At5g59340	WOX2	C		Unique	ND	C	A.1	7	Homeodomain Protein	Transcriptional regulation
At5g59440	ZEUS1	C		Unique		P / Z	A.1	10.1	Thymidylate Kinase	Biosynthesis of dTDP; Regulation of replication
At5g60540	EMB2407	C		Unique		G	A.1	10.1	Imidazoleglycerol-Phosphate Synthase Subunit H; Pyroxidine Amidotransferase	Pyroxidine (vitamin B6) biosynthesis
At5g61410	EMB2728	C	4	Redundant		C	A.2	10.5	Ribulose-5-Phosphate-3-Epimerase	Role in Calvin cycle and oxidative pentose phosphate pathway
At5g62410	TTN3	C		Redundant	EMG	C	C.3	6.2	SMC2 Condensin	Chromosome condensation; Large chromosomal ATPase
At5g62440	DOM1	C		Unique	ND	G	B.3	13	Uncertain	Nucleolar function; Similar to tomato LeDCL
At5g62990	EMB1692	C	1	Redundant		T	C.2/A.3	2.3	PORR Domain Protein	Probable role in organellar RNA splicing or metabolism
At5g63050	EMB2759	C		Unique		G	B.2	13	Unknown	None
At5g63420	EMB2746	C	4	Unique		G	B.2	2.3	Metallo-Beta-Lactamase Family Protein	Putative chloroplast RNA endounclease (Rnase J)
At5g64580	EMB3144	C	2	Redundant		G	B.2	13	Uncertain	AAA ATPase
At5g66055	EMB2036	C	4	Redundant		G	A.2	13	Uncertain	Ankyrin repeat protein
At5g66680	DGL1	C		Unique	ND	G / P	A.3	4.1	OST Complex Subunit	Proposed role in N-linked glycosylation of proteins
At5g67570	EMB1408	C	2	Redundant		T	A.2	2.2	PPR Protein	Processing of organellar mRNAs
a Updated from December 2010 SeedGenes database release. Excludes SSP, MET1, SIG5, PHS1, ARP4, EMB3010. See additional spreadsheet tabs for details on terminal embryo phenotype classes, allele strength ranks, and protein function classes.
b Gene responsible for mutant phenotype confirmed (C) or not confirmed (NC) through allelism tests or molecular complementation.
c Likelihood of protein localization in the chloroplast based on experimental data and prediction programs: from 5 (high) to 1 (low).
d Unique genes lack a significant match in Arabidopsis (e-30 cutoff); Redundant genes have a significant match (e-30 cutoff) that may indicate functional redundancy.
e ND, Effect of mutation on gametophyte development not determined; EMG, GEM, and GAM notations reflect increasingly severe disruptions of gametophyte development.

## Sheet: Phenotype Class
Terminal Phenotype Symbol	Genes	Definition of Terminal Phenotype Symbol
P / Z	14	Preglobular / Zygotic
P	38	Preglobular
P ?	18	Probable Preglobular Based on Seed Size; Embryo Images Not Available
P / EG	9	Preglobular / Early Globular
G / P	14	Globular / Preglobular
EG	15	Early Globular
G	112	Globular
T	35	Transition
C	121	Cotyledon
NA	16	Phenotype Information Not Available
Q	4	Questionable
Total	396

## Sheet: Allele Strength
Allele Strength Rank	Alleles Characterized	Location of Insertion / Mutation
A.1	> 2	Exon, First Third of Gene
A.2	1	Exon, First Third of Gene
A.3	1	Promoter, 5' UTR; Intron, First Third of Gene
B.1	> 2	Exon, Middle Third of Gene
B.2	1	Exon, Middle Third of Gene
B.3	1	Intron, Middle Third of Gene
C.1	> 2	Exon, Last Third of Gene
C.2	1	Exon, Last Third of Gene
C.3	1	Intron, Last Third of Gene

## Sheet: Protein Function Class
Protein Function Class	Protein Function Subclass	Protein Function Class; Subclass
1		DNA Synthesis / Repair
2		RNA Synthesis / Modification
	2.1	Transcription Machinery
	2.2	PPR / RNA Binding Proteins
	2.3	RNA Splicing / Modification / Degradation
3		Protein Synthesis
	3.1	Ribosomal Proteins
	3.2	Aminoacyl-tRNA Synthetases
	3.3	Translation Machinery
4		Protein Modification / Transport
	4.1	Modification; Chaperones
	4.2	Protein Transport / Import
5		Protein Degradation
6		Chromosome Dynamics
	6.1	Chromatin Structure / Modification
	6.2	Chromosome Mechanics; Cell Cycle
7		Transcriptional Regulation
8		Signaling Pathways
9		Energy; Electron Transport
10		Metabolism
	10.1	Biosynthesis of Amino Acids, Vitamins, Nucleotides, and Fatty Acids
	10.2	Biosynthesis of Chlorophyll, Carotenoids, and Terpenoids
	10.3	Biosynthesis of Lipids; Modification of Fatty Acids and Lipids
	10.4	Biosynthesis / Modification of Complex Carbohydrates
	10.5	Other Metabolic Pathways / Enzymes
11		Cell Structure; Membrane Function / Trafficking
	11.1	Cytoskeleton; Cell Wall; Peroxisomes
	11.2	Membrane Transporters
	11.3	Vesicle / Membrane Trafficking / Secretion
12		Remain to be Classified
13		Uncertain / Unknown
