# Supplementary material for: Molecular Foundations of Reproductive Lethality in Arabidopsis thaliana
Source: PLoS One. 2011 Dec 2;6(12):e28398. doi: 10.1371/journal.pone.0028398 (PMC3229588; doi:10.1371/journal.pone.0028398)
Supplement: Table S2 — 173 Arabidopsis genes with a gametophyte-defective phenotype. (XLS) [file pone.0028398.s002.xls]

## Sheet: Table S2
Chromosome Locus	Identity Statusb	Gene Symbol	Gene Redundancy (BLASTP)c	Gametophyte Subclass	Transmission Defect	Homozygotes	Male Gametophyte Phenotype	Protein Function Class	Predicted Function of Gene Product	Reference Lab	Year
Strong Male and Female Defects (T.E. Both < 0.4) (14 Loci)
At1g11890	C	SEC22	Unique	GAM	0 ♂ / FFF	NA	D	11.3	v-SNARE Protein; ER and Golgi Secretory Trafficking	G. Jurgens	2011
At1g19520	NC	NFD5	Redundant	GAM	MMM / FF	[EMBi]		13	Unknown; Mitochondrial Protein	G. Drews	2006
At1g24450	NC	NFD2	Unique	GAM	0 ♂ / FFF	NA		2.3	Ribonuclease III	G. Drews	2006
At1g31817	NC	NFD3	Unique	GAM	MMM / FF	[EMBi]		3.1	Mitochondrial Ribosomal Protein S11	G. Drews	2006
At1g50240	C	FU; TIO	Redundant	GAM	0 ♂ / FFF	NA	D	8	Serine/Threonine Protein Kinase	D. Twell	2005
At2g20585	NC	NFD6	Unique	GAM	MMM / FF	[EMBi]		13	Unknown; Mitochondrial Protein	G. Drews	2006
At2g34220	NC	PDD12; MEE20	Redundant	GAM	0 ♂ / FF	NA	D	13	Unknown	S. McCormick	2009
At2g35070	NC	PGD4	Redundant	GAM	0 ♂ / FF	NA	G	13	Unknown	S. McCormick	2009
At3g12280	C	Rb; RBR	Unique	GAM	MMM / 0 ♀	NA	D	6.2	Repressor of cell proliferation	F. Berger	2009
At3g59550	C	SYN3; AtRAD21.2	Redundant	GAM	MM / 0 ♀	NA	G	6.2	α-Kleisin Cohesin Protein	C. Makaroff	2007
At4g05450	NC	PGD6	Redundant	GAM	MM / FF	[EMBi]	G	9	Mitochondrial Adrenodoxin-Like Ferredoxin	S. McCormick	2009
At4g21710	C	EMB1989; NRPB2	Redundant	GAM	MM / 0 ♀	NA	T	2.1	RNA Polymerase II Subunit	C. Pikaard	2009
At5g45140	C	NRPC2	Redundant	GAM	MM / 0 ♀	NA	T	2.1	RNA Polymerase III Subunit	C. Pikaard	2008
At5g67100	C	ICU2	Redundant	GAM	MM / FF	EMB		1	DNA Polymerase Alpha	J. Barrero	2007
Severe Male Defect (T.E. <0.1); Weak Female Defect (44 Loci)
At1g02140	C	HAP1; MAGO; MEE63	Unique	GAM	MMM / +	[EMBi]	T	2.3	Component of Exon Junction Complex	D. Preuss	2004
At1g08660	C	MGP2	Redundant	GAM	0 ♂ / +	NA	GT	10.5	Golgi-localized Sialyltransferase	D. Ye	2010
At1g14830	C	ADL1C; ADL5; DRP1C	Redundant	GAM	0 ♂ / +	NA	D	11.3	Plasma Membrane Dynamics	S. Bednarek	2003
At1g60490	C	AtVPS34; PI3K	Redundant	GAM	0 ♂ / +	NA	D	12	Phosphatidylinositol 3-Kinase	Y. Lee	2008
At1g64570	C	DUO3	Unique	GAM	0 ♂ / +	NA	Not G	13	Uncertain	D. Twell	2009
At1g71270	C	VPS52; POK; TTD8	Redundant	GAM	MMM / +	[EMBi]	T	11.3	Membrane Trafficking	S. Bonhomme	2008
At1g74260	C	PUR4	Unique	GAM	0 ♂ / F	NA	D	10.1	De Novo Purine Biosynthesis Pathway	F. Budar	2008
At1g77140	C	VPS45	Unique	GAM	0 ♂ / F	NA	G	11.3	Vacuolar Sorting Receptor Recycling	D. Bassham	2009
At1g78900	C	VHA-A	Unique	GAM	0 ♂ / F	NA	D	11.2	Vacuolar Proton Pump	K. Schumacher	2005
At2g03120	C	AtSPP	Unique	GAM	MMM / +	[EMBi]	G	4.1	Signal Peptide Peptidase	D. Schnell	2009
At2g21870	C	MGP1	Unique	GAM	0 ♂ / F	NA	D	9	Mitochondrial ATP Synthase	D. Ye	2010
At2g34680	C	SETH1; AIR9	Unique	GAM	MMM / +	[EMBi]	GT	11.1	Microtubule-Associated Protein	D. Twell	2004
At2g39990	C	AteIF3f	Unique	GAM	MMM / +	EMB	G	3.3	Translation Initiation Factor	D. Ye	2010
At2g43040	C	NPG1	Redundant	GAM	0 ♂ / +	NA	G	8	Calmodulin Binding Protein	A. Reddy	2003
At3g01780	C	TPLATE	Unique	GAM	0 ♂ / +	NA	DG	11.3	Vesicle Trafficking; Cell Wall Modification	D. Geelen	2006
At3g05530	C	RPT5a	Redundant	GAM	0 ♂ / F	NA	D	5	Proteasome AAA-ATPase	P. Guerche	2009
At3g10380	C	SEC8	Unique	GAM	0 ♂ / +	NA	G	11.3	Plasma Membrane Vesicle Docking	J. Fowler	2005
At3g45100	NC	SETH2	Unique	GAM	MMM / +	[EMBi]	GT	12	GPI Anchor Biosynthesis	D. Twell	2004
At3g45150	NC	TCP16	Unique	GAM	0 ♂ / F	NA	D	7	Putative Transcription Factor	C. Ueguchi	2006
At3g54690	C	SETH3	Unique	GAM	0 ♂ / +	NA	Not D	10.5	Arabinose-5-Phosphate Isomerase	D. Twell	2004
At3g60460	C	DUO1	Redundant	GAM	0 ♂ / +	NA	F	7	R2R3 MYB Transcription Factor	D. Twell	2005
At3g61710	C	ATG6; AtVPS30	Unique	GAM	0 ♂ / F	NA	G	11.3	Vacuolar Protein Sorting	Y. Ohsumi	2007
At4g00330	NC	PDD25; CRCK2	Redundant	GAM	0 ♂ / F	NA	D	8	Calmodulin-Binding Receptor-Like Kinase	S. McCormick	2009
At4g00800	NC	SETH5	Unique	GAM	MMM / F	[EMBi]	G	11.3	Putative Vps8 Homolog	D. Twell	2004
At4g01220	C	MGD4	Redundant	GAM	0 ♂ / +	NA	T	10.5	Xylosyltransferase	D. Ye	2011
At4g02195	NC	SYP42; AtTLG2B	Redundant	GAM	0 ♂ / X	NA	G	11.3	Transport Vesicle-Membrane Fusion	N. Raikhel	2001
At4g11720	C	HAP2; GCS1	Unique	GAM	MMM / +	[EMBi]	TF	13	Uncertain; Putative Membrane Protein	D. Preuss	2006
At4g21150	NC	HAP6	Unique	GAM	0 ♂ / F	NA	T	11.3	Membrane Trafficking	D. Preuss	2004
At4g24580	C	REN1	Redundant	GAM	0 ♂ / +	NA	T	11.3	Rho GTPase-Activating Protein	Z. Yang	2008
At4g32410	C	RSW1; CESA1	Redundant	GAM	0 ♂ / X	NA	D	10.4	Cellulose Synthase Catalytic Subunit	C. Somerville	2007
At4g34940	C	ARO1; SETH4	Redundant	GAM	0 ♂ / +	NA	Not D	8	Armadillo Repeat Protein	S. Sprunck	2008
At4g36480	C	EMB2779; LCB1; FBR11	Redundant	GAM	0 ♂ / F	NA	D	10.3	Serine Palmitoyltransferase (LCB1); Sphingolipid Biosynthesis	J. Zuo	2008
At4g38190	C	CSLD4	Redundant	GAM	0 ♂ / +	NA	G	10.4	Putative Glycosyltransferase; Cell Wall Biosynthesis	W. Willats	2008
At5g05170	C	CEV1; IXR1; CESA3	Redundant	GAM	0 ♂ / X	NA	D	10.4	Cellulose Synthase CeSA3	C. Somerville	2007
At5g14870	C	CNGC18	Redundant	GAM	0 ♂ / +	NA	T	11.2	Cyclic Nucleotide Gated Channel	J. Harper	2007
At5g16830	C	SYP21; PEP12	Redundant	GAM	0 ♂ / X	NA	G	11.3	Transport Vesicle-Membrane Fusion	N. Raikhel	2001
At5g19610	C	GNL2	Redundant	GAM	0 ♂ / +	NA	G	11.3	ADP-Ribosylation Factor-Guanine Nucleotide Exchange Factor	D. Ye	2009
At5g26980	NC	SYP41	Redundant	GAM	0 ♂ / X	NA		11.3	Transport Vesicle-Membrane Fusion	N. Raikhel	2001
At5g52560	C	AtUSP	Unique	GAM	0 ♂ / X	NA		10.5	UDP-Sugar Phosphorylase; Salvage Pathway Enzyme	Y. Tsumuraya	2007
At5g55810	C	AtNMNAT	Unique	GAM	MMM / +	EMB	T	10.1	NAD Biosynthesis/ Pollen Development	H. Uchimiya	2007
At5g57350	C	AHA3	Redundant	GAM	0 ♂ / +	NA	D	11.2	Plasma Membrane Proton Pump	M. Sussman	2004
At5g63890	C	HISN8; HDH; PDD3	Unique	GAM	0 ♂ / F	NA	D	10.1	Histidine Biosynthesis	D. Meinke	2007
At5g64560	C	MGT9	Redundant	GAM	0 ♂ / +	NA	D	11.2	Low-Affinity Magnesium Transporter	D. Li	2009
At5g66760	C	SDH1-1	Redundant	GAM	0 ♂ / F	NA	D	9	Component of Mitochondrial Succinate Dehydrogenase Complex	X. Jordana	2007
Severe Female Defect (T.E. <0.1); Weak Male Defect (12 Loci)
At1g14320	NC	SAC52	Redundant	GAM	+ / 0 ♀	NA		3.1	Ribosomal Protein L10	T. Takahashi	2008
At1g16280	C	SWA3; AtRH36	Redundant	GAM	+ / FFF	[EMBi]		2.3	DEAD-Box RNA Helicase; Role in rRNA Biogenesis	W. Yang	2010
At1g25350	NC	OVA9	Redundant	GAM	M / 0 ♀	NA		3.2	AARS (Glutamine)	D. Meinke	2005
At1g29940	C	NRPA2	Redundant	GAM	M / 0 ♀	NA	T	2.1	RNA Polymerase I Subunit	C. Pikaard	2008
At2g04660	C	APC2	Unique	GAM	+ / FFF	[EMBi]		5	Ubiquitin Protein Ligase Subunit	P. Genschik	2003
At2g24840	C	AGL61; DIA	Redundant	GAM	+ / FFF	[EMBi]		7	Type I MADS Domain Transcription Factor	G. Drews	2008
At2g47430	C	CKI1	Redundant	GAM	M / 0 ♀	NA		8	Histidine Kinase; Cytokinin Perception	B. Brzobohaty	2003
At2g47990	C	SWA1; EDA13; EDA19	Unique	GAM	M / 0 ♀	NA		12	18S Ribosomal RNA Biogenesis	W. Yang	2005
At3g06400	NC	CHR11	Redundant	GAM	+ / FFF	ND		6.1	Chromatin-Remodeling Protein	J. Vielle-Calzada	2005
At4g15570	NC	MAA3	Redundant	GAM	M / FFF	[EMBi]		2.2	RNA Helicase	K. Okada	2008
At5g48030	C	GFA2	Redundant	GAM	M / 0 ♀	NA		4.1	Mitochondrial Chaperone; DNA J Protein	G. Drews	2002
At5g48670	C	FEM111; AGL80	Redundant	GAM	+ / 0 ♀	NA		7	MADS-Box Transcription Factor	G. Drews	2006
Strong Female Defect (T.E. <0.4) (4 Loci)
At3g23440	NC	EDA6; MEE46	Unique	GAM or GEM	X / FF	ND		13	Unknown	V. Sundaresan	2005
At3g57650	C	LPAT2	Redundant	GAM or GEM	+ / (FF)	ND		10.5	Lysophosphatidic Acid Metabolism	A. Huang	2005
At4g00310	NC	EDA8; MEE23	Redundant	GAM or GEM	X / FF	ND		13	Unknown	V. Sundaresan	2005
At4g13890	NC	EDA36; EDA37; PDD4; PDD33	Redundant	GAM or GEM	X / FF	ND		10.5	Serine Hydroxymethyltransferase	V. Sundaresan	2005
GEM Loci - Aborted Embryos (2-10%) Expected (25 Loci)
At1g04950	C	EMB2781; TAF6	Redundant	GEM	MM / +	EMB	T	7	TATA Box Binding Protein	M. Kater	2005
At1g20200	NC	EMB2719; HAP15	Redundant	GEM	MMM / +	EMB	T	5	26S Proteasome Regulatory Subunit (RPN3)	D. Meinke	2002
At1g31470	NC	NFD4	Redundant	GEM	M / FF	EMBi		13	Uncertain; Mitochondrial Nodulin-Like Protein	G. Drews	2006
At1g68990	C	RPOTm; RPOMT	Redundant	GEM	MMM / FF	[EMBi]		2.1	Mitochondrial RNA Polymerase	J. Whelan	2009
At1g72440	C	SWA2; EDA25	Unique	GEM	M / FF	EMB	D	12	18S Ribosomal RNA Biogenesis	W. Yang	2009
At1g78770	C	APC6; NOMEGA; CDC16	Unique	GEM	M / FF	ND		5	Anaphase Promoting Complex Subunit	V. Sundaresan	2003
At1g79940	C	AtERDJ2A	Redundant	GEM	MM / +	EMBi	G	4.2	ER J Domain Protein; Protein Translocation	S. Nishikawa	2008
At2g02955	C	MEE12; CCG	Unique	GEM	+ / FF	EMBi		7	Nuclear Zinc Finger Protein	W. Yang	2007
At2g25710	Y	HCS1	Redundant	GEM	+ / FF	EMB		10.5	Holocarboxylase Synthetase	C. Alban	2008
At2g36850	C	GSL8	Redundant	GEM	MM / X	EMB	D	10.4	Callose Biosynthesis	P. Schulze-Lefert	2008
At2g41500	C	EMB2776; PRP4; LIS	Redundant	GEM	M / FFF	EMB		2.3	U4/U6 snRNP (Prp4)	U. Grossniklaus	2007
At3g05770	NC	PGD8	Redundant	GEM	MM / +	EMBi	G	13	Unknown	S. McCormick	2009
At3g09840	C	CDC48	Redundant	GEM	MMM / F	EMB	GT	4.1	AAA-ATPase Chaperone	S. Bednarek	2008
At3g11940	Y	AML1	Redundant	GEM	MM / FF	EMB		3.1	Ribosomal Protein S5	R. Offringa	2001
At3g16640	NC	TCTP	Redundant	GEM	MMM / +	[EMBi]	T	8	GTPase; TOR Signaling Pathway	J. Masle	2008
At3g51550	C	FER; SIR	Redundant	GEM	M / FF	EMBi	F	8	Plasma-Membrane Localized Receptor-Like Kinase	U. Grossniklaus	2007
At4g14790	NC	PDD17; PDD26; AtSUV3	Redundant	GEM	MMM / F	[EMBi]	D	2.2	RNA Helicase	S. McCormick	2009
At4g19490	C	AtVPS54	Unique	GEM	MM / FF	[EMBi]		11.3	Vesicle Trafficking	S. Bonhomme	2008
At4g26466	C	LRE	Redundant	GEM	+ / F	EMB		12	GPI Anchor Protein	V. Sundaresan	2008
At4g30930	C	NFD1; At4g30925	Unique	GEM	MM / FF	[EMBi]		3.1	Mitochondrial Ribosomal Subunit L21	G. Drews	2006
At4g37450	NC	AGP18	Unique	GEM	+ / (F)	EMBi		12	Cell Surface Proteoglycan	J. Vielle-Calzada	2004
At5g05970	C	NEDD1	Unique	GEM	MM / F	EMBi	D	11.1	WD40 Protein; Microtubule Organization	B. Liu	2009
At5g22130	N	PNT1	Unique	GEM	MMM / +	EMB		10.5	ER-Localized Mannosyl Transferase	S. Gillmor	2005
At5g48600	C	SMC4; AtCAP-C	Redundant	GEM	(M) / FF	EMB	D	6.2	Condensin	C. Riggs	2006
At5g54800	C	GPT1	Redundant	GEM	MM / FF	EMBi	D	11.2	Plastid Glucose Import	A. Schneider	2005
GEM / EMG Classification Uncertain / Conflicted (3 Loci)
At2g34790	NC	EDA28; MEE23	Redundant	GEM or EMG	X / F	ND		10.5	FAD Binding Domain Protein	V. Sundaresan	2005
At2g47470	NC	UNE5; TED18; PDI11; MEE30	Redundant	GEM or EMG	X / F	ND		4.1	Protein Disulfide Isomerase	V. Sundaresan	2005
At3g52590	NC	EMB2167; HAP4	Redundant	GEM or EMG	MM / F (LRMS)	EMB	T	12	Ubiquitin - Ribosomal Protein Fusion (Recent Duplication)	Meinke; Johnson	2004
EMG Class of Embryo / Gametophyte Defectives (44 Loci)
At1g11870	NC	OVA7	Redundant	EMG	X / (F)	OVA		3.2	AARS (Serine)	D. Meinke	2005
At1g14610	C	TWN2	Redundant	EMG	+ / F	EMB		3.2	Valyl tRNA Synthetase	C. Somerville	1997
At1g31860	C	HISN2	Unique	EMG	LRMS; NRSD	EMB		10.1	Histidine Biosynthesis	D. Meinke	2007
At1g36160	C	ACC1; PAS3; GK; EMB22	Redundant	EMG	LRMS; NRSD	EMB		10.1	Acetyl-CoA Carboxylase	C. Rochat	2004
At1g43710	NC	EMB1075	Unique	EMG	LRMS; NRSD	EMB		10.5	Serine Decarboxylase	D. Meinke	2002
At1g48850	NC	EMB1144		EMG	NRSD	EMB		10.1	Chorismate Synthase	D. Meinke	2003
At1g50500	C	HIT1; AtVPS53	Redundant	EMG	MM / F	EMBi		11.3	Vacuole Protein Sorting; Endosome-Golgi Vesicle Trafficking	S. Wu	2006
At1g67320	C	EMB2813	Unique	EMG	(LRMS)	EMB		1	DNA Polymerase Alpha (POLA3)	D. Meinke	2010
At1g67490	C	KNF; GCS	Redundant	EMG	(M) / X	EMB		4.1	Alpha Glucosidase I
At1g80410	NC	EMB2753; FEY	Unique	EMG	LRMS; NRSD	EMB		4.1	N-Terminal Acetyltransferase	D. Meinke	2004
At2g03870	NC	EMB2816	Unique	EMG	(LRMS)	EMB		2.3	snRNP; RNA Splicing (LSm7)	D. Meinke	2010
At2g25840	NC	OVA4	Unique	EMG	+ / F	OVA		3.2	AARS (Tryptophan)	D. Meinke	2005
At2g35650	C	CSLA7	Redundant	EMG	MM / +	EMB		10.4	Cellulose Synthase-Like Glycosyltransferase	P. Dupree	2003
At2g36230	C	HISN3; APG10	Unique	EMG	LRMS; NRSD	EMB		10.1	Histidine Biosynthesis	D. Meinke	2007
At2g41350	NC	EMB2819	Unique	EMG	(LRMS)	EMB		11.1	HAUS1 Subunit of Augmin Complex	D. Meinke	2010
At2g47620	C	AtSWI3A	Redundant	EMG	Complex	EMB		6.1	DNA Binding Protein	A. Jerzmanowski	2007
At3g02660	C	EMB2768	Unique	EMG	(LRMS; NRSD)	EMB		3.2	Tyrosine tRNA Synthetase	D. Meinke	2007
At3g04680	C	CLPS3	Redundant	EMG	+ / F	EMB		2.3	Polyadenylation Factor	Q. Li	2008
At3g05000	NC	TGD8	Unique	EMG	MM / +	EMBi	T	11.3	Transport Protein Particle Component; Vesicle Transport	S. McCormick	2009
At3g13490	NC	OVA5	Redundant	EMG	M / F	OVA		3.2	AARS (Lysine)	D. Meinke	2005
At3g48930	NC	EMB1080	Redundant	EMG	NRSD	EMB		3.1	Ribosomal Protein S11	D. Meinke	2002
At3g55400	NC	OVA1	Redundant	EMG	M / F	OVA		3.2	AARS (Methionine)	D. Meinke	2005
At3g57870	C	EMB1637; SCE1	Unique	EMG	LRMS	EMB		4.1	SUMO Conjugating Enzyme (SCE1)	D. Meinke	2003
At4g02060	C	PRL	Redundant	EMG	LRMS	EMB		1	DNA Replication Licensing Factor	P. Springer	2002
At4g02570	C	AXR6; CUL1	Redundant	EMG	M / F	EMB		5	Cullin 1 Protein	M. Estelle	2000
At4g05410	C	YAO	Redundant	EMG	M / +	EMB		2.2	snoRNP Protein	W.C. Yang	2010
At4g17300	NC	OVA8	Redundant	EMG	X / (F)	OVA		3.2	AARS (Asparagine)	D. Meinke	2005
At4g26900	C	HISN4	Unique	EMG	LRMS; NRSD	EMB		10.1	Histidine Biosynthesis	D. Meinke	2007
At5g02190	C	AtASP38; EMB24	Redundant	EMG	M / F	EMB		5	Aspartic Protease	Y. Xia	2005
At5g08470	C	EMB2817	Redundant	EMG	(LRMS)	EMB		11.1	AAA ATPase (PEX1)	D. Meinke	2010
At5g16390	C	CAC1A	Redundant	EMG	MM / +	EMB		10.1	Biotin Carboxyl Carrier Protein	B. Nikolau	2011
At5g16750	C	TOZ	Unique	EMG	+ / F	EMB		13	Uncertain	V. Sundaresan	2007
At5g18700	NC	EMB3013; RUK	Redundant	EMG	LRMS	EMB		11.1	Microtubule-Associated Kinase	D. Meinke	2004
At5g22330	NC	AtTIP49a; RIN1	Redundant	EMG	+ / FF	EMBi		7	RPM1-Interacting Protein; Associated with TATA Binding Protein	J. Dangl	2002
At5g27540	C	EMB2473; MIRO1	Redundant	EMG	LRMS; NRSD	EMB		12	Mitochondrial GTPase	D. Meinke	2003
At5g37510	NC	EMB1467	Unique	EMG	LRMS; NRSD	EMB		9	Mitochondrial NADH Dehydrogenase	D. Meinke	2003
At5g39750	NC	EMB3008	Redundant	EMG	NRSD	EMB		7	MADS-Box Family Protein	D. Meinke	2004
At5g40480	NC	EMB3012	Unique	EMG	LRMS	EMB		4.2	Nuclear Pore Complex Protein (Nup210)	D. Meinke	2004
At5g48230	C	EMB1276; AACT2	Redundant	EMG	LRMS	EMB		10.5	Acetyl CoA Acetyl Transferase (Thiolase)	D. Meinke	2002
At5g49030	NC	OVA2	Redundant	EMG	M / F	OVA		3.2	AARS (Isoleucine)	D. Meinke	2005
At5g52520	NC	OVA6	Redundant	EMG	X / (F)	OVA		3.2	AARS (Proline)	D. Meinke	2005
At5g55940	NC	EMB2731	Unique	EMG	LRMS; NRSD	EMB		2.3	Processome Protein (NOC4)	D. Meinke	2003
At5g62410	C	TTN3	Redundant	EMG	LRMS; NRSD	EMB		6.2	SMC2 Condensin	D. Meinke	2002
At5g64050	C	OVA3	Unique	EMG	M / F	OVA		3.2	AARS (Glutamate)	D. Meinke	2005
Gametophyte Defective; Homozygous Plants Obtained (14 Loci)
At1g59820	NC	ALA3; ITB2	Redundant	Viable	MM / +	VEG	GT	11.3	Lipid Translocation; Secretory Vesicle Formation	D. Oppenheimer	2009
At1g69940	C	PPME1	Redundant	Viable	+ / +	GAM	T	10.4	Pectin Methylesterase	V. Citovsky	2006
At1g71880	C	SUC1	Redundant	Viable	MMM / +	COND	G	11.2	Plasma Membrane Sugar Transporter; Sucrose Signaling	J. Ward	2008
At2g25600	C	SPIK; AKT6	Redundant	Viable	(M) / X	GAM	GT	11.2	Shaker Family K+ Channel	H. Sentenac	2002
At2g35630	C	GEM1; MOR1	Unique	Viable	MM / FF	GAM	D	11.1	Microtubule Organization; Phragmoplast Orientation	D. Twell	1998
At2g46020	C	BRM; CHA2; CHR2	Redundant	Viable	M / F	VEG		6.1	SNF2 Protein; Chromatin Remodeling	J. Reyes	2006
At2g47040	C	VGD1	Redundant	Viable	MMM / +	GAM	T	10.4	Pectin Methylesterase; Putative Cell Wall Modification	D. Ye	2005
At3g08970	C	AtERdj3A; TMS1	Unique	Viable	MM / +	GAM	T	4.1	ER DnaJ Domain Protein; Disulfide Isomerase; Molecular Chaperone	D. Ye	2009
At3g12160	C	RABA4D	Redundant	Viable	+ / +	GAM	T	11.3	Rab GTPase; Membrane Trafficking	E. Nielsen	2009
At3g22200	C	POP2; HER1	Redundant	Viable	M / +	GAM	T	10.5	GABA Transaminase; GABA Degradation	D. Preuss	2003
At4g00020	NC	AtBRCA2a; EDA20; MEE43	Redundant	Viable	X / FF	COND		1	DSB Repair; Homologous Recombination	S. Toki	2009
At4g18770	C	MYB98	Redundant	Viable	+ / FFF	GAM		7	R2R3 Transcription Factor; Synergid Cell Development	G. Drews	2005
At4g24190	C	SHD	Redundant	Viable	MMM / +	VEG	T	4.1	GRP94 Ortholog; HSP90-Like Protein	K. Okada	2002
At5g49680	C	KIP; TTD	Redundant	Viable	+ / +	CELL	T	13	Unknown; SABRE-Like Protein	S. Bonhomme	2003
Gametophyte Defective; Classification Uncertain (13 Loci)
At2g07050	C	CAS1	Redundant	Uncertain	(M) / X	ND		10.5	Sterol Biosynthesis; 2,3-Oxidosqualene Cyclase	H. Schaller	2008
At2g33100	NC	CSLD1	Redundant	Uncertain	(M) / X	ND	G	10.4	Putative Glycosyltransferase; Cell Wall Biosynthesis	W. Willats	2008
At2g41110	C	CAM2	Redundant	Uncertain	M / +	WT	GT	8	Calmodulin; Role in Calcium Signaling	C. Tonelli	2010
At2g47750	NC	KEN; GH3.9	Redundant	Uncertain	X / (F)	ND		10.5	GH3 Family Protein; Indole-3-Acetic Acid-Amido Synthetase	U. Grossniklaus	2007
At3g06560	C	PAPS3	Redundant	Uncertain	Uncertain	ND		2.3	Cytoplasm localized; mRNA 3' End Formation	A. Hunt	2009
At3g07160	C	AtGSL10	Redundant	Uncertain	(M) / X	ND	D	10.4	Callose Synthesis	P. Schulze-Lefert	2008
At3g19590	NC	Bub3.1	Redundant	Uncertain	(M) / (F)	ND	D	6.2	Spindle Checkpoint Protein	I. Schubert	2008
At4g18830	NC	OFP5	Unique	Uncertain	X / (F)	ND		13	Unknown	V. Sundaresan	2007
At4g28580	C	MGT5	Redundant	Uncertain	(M) / X	ND	D	11.2	Mitochondrial Magnesium Transporter	S. Luan	2008
At5g16020	NC	GEX3	Unique	Uncertain	+ / X	ND		13	Unknown; Plasma-Membrane Localized	S. McCormick	2008
At5g39400	NC	AtPTEN1	Redundant	Uncertain	(M) / X	ND	D	8	Tyrosine Phosphatase	S. Luan	2002
At5g46860	NC	SGR3; SYP22; VAM3	Redundant	Uncertain	(M) / X	ND		11.3	Transport Vesicle-Vacuole Fusion	N. Raikhel	2001
At5g57320	C	VLN5	Redundant	Uncertain	(M) / X	ND	T	11.1	Actin Binding Protein; Role in Actin Filament Dynamics	S. Huang	2010
a See additional spreadsheet tabs for details on gametophyte subclasses, transmission defects, homozygote classes, male phenotypes, and protein function classes.
b Gene responsible for mutant phenotype confirmed (C) or not confirmed (NC) through molecular complementation or the analysis of multiple insertion lines.
c Unique genes lack a significant match in Arabidopsis (e-30 cutoff); Redundant genes have a significant match (e-30 cutoff) that may indicate functional redundancy.
Genes identified after dataset established: Viable homozygotes: NTA, CSI1, RPA, BLI, SCP, PAO3, EXO70C1, TIP1, AGO9, AtMYB32, GPA1, PMS1; Bicellular pollen: CDC2, FBL17, XRI1; GAM: NOF1; GEM: VDD; EMG: CTF7, GFA1, SYCO, AtLeuD3

## Sheet: Gametophyte Subclasses
Subclass	Definition of Subclass
GAM	< 2% mutant seeds predicted or observed
GEM	2-10% mutant seeds predicted or observed
EMG	> 10% mutant seeds predicted or observed
Viable	Viable homozygotes produced; No embryo defects documented
Uncertain	Insufficient details on transmission efficiency to assign subclass

## Sheet: Transmission Defects
Symbol	Definition of Transmission Symbol
0 ♂	No transmission observed through male gamete
0 ♀	No transmission observed through female gamete
MMM	Male transmission efficiency > 0 but < 0.1.
FFF	Female transmission efficiency > 0 but < 0.1.
MM	Male transmission efficiency > 0.1 but < 0.4.
FF	Female transmission efficiency > 0.1 but < 0.4.
M	Male transmission efficiency > 0.4 but < 0.8.
F	Female transmission efficiency > 0.4 but < 0.8.
+	Transmission efficiency > 0.8.
(M); (F)	Reduced transmission noted; supporting data not presented.
X	Transmission not discussed.
LRMS	Low ratio of mutant seeds in siliques of selfed heterozygotes.
NRSD	Non-random seed distribution in siliques of selfed heterozygotes.
Note: See Methods section for definition of transmission efficiency.

## Sheet: Homozygote Classes
Class	Definition of Homozygote Class
NA	No homozygotes expected; absence of male or female transmission
EMBi	Defect in embryo development inferred from reduced transmission efficiency and absence of homozygous mutant plants
[EMBi]	Rare defect in embryo development inferred (< 2% mutant seeds)
EMB	Defect in embryo development observed
ND	Not determined; cannot be inferred from limited data presented
OVA	Ovule abortion phenotype observed
VEG	Homozygotes viable; Vegetative defects observed
GAM	Homozygotes viable; Gametophyte defects observed
COND	Homozygotes viable; Conditional defects observed
CELL	Homozygotes viable; Cellular defects observed

## Sheet: Male Phenotypes
Symbol	Definition of Phenotype Symbol
D	Defective in pollen development
G	Defective in pollen germination
T	Defective in pollen-tube growth
F	Defective in fertilization

## Sheet: Protein Function Classes
Protein Function Class	Protein Function Subclass	Protein Function Class; Subclass
1		DNA Synthesis / Repair
2		RNA Synthesis / Modification
	2.1	Transcription Machinery
	2.2	PPR / RNA Binding Proteins
	2.3	RNA Splicing / Modification / Degradation
3		Protein Synthesis
	3.1	Ribosomal Proteins
	3.2	Aminoacyl-tRNA Synthetases
	3.3	Translation Machinery
4		Protein Modification / Transport
	4.1	Modification; Chaperones
	4.2	Protein Transport / Import
5		Protein Degradation
6		Chromosome Dynamics
	6.1	Chromatin Structure / Modification
	6.2	Chromosome Mechanics; Cell Cycle
7		Transcriptional Regulation
8		Signaling Pathways
9		Energy; Electron Transport
10		Metabolism
	10.1	Biosynthesis of Amino Acids, Vitamins, Nucleotides, and Fatty Acids
	10.2	Biosynthesis of Chlorophyll, Carotenoids, and Terpenoids
	10.3	Biosynthesis of Lipids; Modification of Fatty Acids and Lipids
	10.4	Biosynthesis / Modification of Complex Carbohydrates
	10.5	Other Metabolic Pathways / Enzymes
11		Cell Structure; Membrane Function / Trafficking
	11.1	Cytoskeleton; Cell Wall; Peroxisomes
	11.2	Membrane Transporters
	11.3	Vesicle / Membrane Trafficking / Secretion
12		Remain to be Classified
13		Uncertain / Unknown
