# Supplementary material for: Molecular Foundations of Reproductive Lethality in Arabidopsis thaliana
Source: PLoS One. 2011 Dec 2;6(12):e28398. doi: 10.1371/journal.pone.0028398 (PMC3229588; doi:10.1371/journal.pone.0028398)
Supplement: Table S5 — 152 unique true EMB genes of Arabidopsis . (XLS) [file pone.0028398.s005.xls]

## Sheet: Table S5
Locus	Gene Symbol	Identity Statusb	CPT Rankc	MIT Rankc	Strongest Allele Phenotype	Maximal Allele Strength	Protein Function Class	Predicted Protein Function	Additional Comments on Predicted Protein Function
At1g01370	CENH3	C		1	NA	NA	6.1	Centromere-Specific Histone	Component of centromeric nucleosomes
At1g03360	RRP4	C		4	P	A.2	2.3	rRNA Processing; Exonuclease	Exosome subunit; RNA metabolism
At1g04635	EMB1687	C			G	A.1	2.3	Ribonuclease P Family (POP5)	Processing of tRNAs
At1g05190	EMB2394	C	4		G	A.3	3.1	Chloroplast 50S Ribosomal Protein L6	Translation in chloroplast
At1g06950	TIC110	C	4		G	B.3 / C.2	4.2	Chloroplast Import Protein	Membrane protein that facilitates protein import into chloroplasts
At1g07320	EMB2784	NC	4		G	A.2	3.1	Plastid Ribosomal Protein L4	Translation in chloroplasts
At1g09770	AtCDC5	NC			P / Z	C.2	7	MYB Domain Transcription Factor	Cell cycle control
At1g10510	EMB2004	C	2		G	A.1	13	Uncertain	Chloroplast-localized LRR protein
At1g11680	EMB1738	C			C	A.1	10.5	Obtusifoliol 14-Alpha Demethylase (CYP51)	Cytochrome P450 monooxygenase; Catalyzes sterol biosynthestic step upstream of FACKEL
At1g15220	AtCCMH	NC		1	C	B.2	9	Mitochondrial Cytochrome C Maturation	Mitochondrial thiol-disulfide oxidoreductase
At1g19800	TGD1	C	3		C	NA	11.2	Chloroplast Envelope Protein	Putative component of a lipid transporter
At1g20050	HYD1	C			C	A.2	10.5	Sterol Isomerase	Catalyzes sterol biosynthetic step downstream of FACKEL
At1g21310	RSH	C			C	A.3	11.1	Cell Wall Hydroxyproline-Rich Glycoprotein	Cell wall protein required for normal cell shape and correct positioning of the cell plate during cytokinesis
At1g24340	EMB2421	NC			G	B.2	10.5	Polyketide Hydroxylase Related Monooxygenase	None
At1g24706	EMB2793	C			C	B.1	2.1	THO/TREX Complex Component (THO2)	Transcription elongation; mRNP biogenesis; genome integrity
At1g48175	EMB2191	C			P	A.2	2.3	tRNA Adenosine Deaminase	Catalytic (TAD2) subunit; Modification of wobble position
At1g48350	EMB3105	NC	4		G / P	NA	3.1	Chloroplast 50S Ribosomal Protein L18	Translation in chloroplast
At1g49510	EMB1273	C	2		C	A.2	13	Unknown	None
At1g49770	RGE1	C			C	A.2	7	bHLH Protein	Regulation of transcription
At1g49880	EMB3106	C		1	G / P	A.2	12	Mitochondrial Sulfhydryl Oxidase	Disulfide bond formation
At1g51450	TRAUCO	C			G	B.2	7	Trithorax Class Transcriptional Regulator	Regulation of transcription
At1g53580	ETHE1	C			T	B.2	12	Glyoxylate-Like Protein	Similar to human gene responsible for ethylmalonic encephalopathy
At1g55350	EMB1275	C			P	A.1	12	Calpain-Type Cysteine Protease	Similar to maize DEK1
At1g55900	EMB1860	C		5	P	B.2	4.2	Inner Mitochondrial Membrane Protein (Tim50)	Import of mitochondrial matrix proteins
At1g56200	EMB1303	C	5		C	A.1	13	Unknown	None
At1g64790	ILA	NC	1		T	B.2	3.3	Translational Activator (GCN1)	Regulation of translation
At1g67630	EMB2814	C		1	P ?	A.2	1	DNA Polymerase Alpha (POLA2)	DNA replication
At1g68730	AtZR1	NC			NA	B.2	7	Zinc Finger Protein	Transcriptional regulation
At1g71440	PFI	C			P	A.1	11.1	Tubulin Folding Cofactor E	Regulation of tubulin folding and microtubule dynamics
At1g74970	TWN3	NC	3		C	B.3	3.1	Ribosomal Protein S9	Translation in chloroplast
At1g75350	EMB2184	NC	4		T	B.2	3.1	Chloroplast Ribosomal Protein L31	Translation in chloroplast
At1g76060	EMB1793	C		1	EG	B.2	13	Uncertain	Complex 1 LYR motif
At1g78630	EMB1473	NC	4		G	C.3	3.1	Chloroplast Ribosomal Protein L13	Translation in chloroplast
At1g79350	EMB1135	NC			C	C.2	7	DNA-Binding Protein	Putative transcription factor
At1g79810	PEX2	C			T	C.3	11.1	Peroxisomal Protein	Putative role in photomorphogenic pathway
At2g01350	QPT	C	2	4	G / P	A.1	10.1	NAD Biosynthesis	Catalyzes the third step in NAD biosynthesis from aspartate in plastids
At2g01860	EMB975	C	1		G	NA	2.2	PPR Protein	Processing of organellar mRNAs
At2g03150	EMB1579	C			C	A.1	13	Uncertain	Putative calcium binding protein
At2g17250	EMB2762	C			G	B.3	2.2	U3 SnoRNP	Proposed role in ribosome biogenesis
At2g18290	EMB2783	C			Q	B.3 / A.3	5	Anaphase-Promoting Complex (APC10)	Ubiquitin protein ligase; Cell cycle control
At2g19450	TAG1	C			C	A.2	10.3	Diacylglycerol Transferase (DGAT)	Enzyme in Kennedy pathway of storage lipid biosynthesis
At2g25660	EMB2410	C	2		G	A.1	13	Unknown	None
At2g26350	PEX10	C			T	A.2	11.1	Peroxisomal Protein	Membrane protein associated with peroxisomes
At2g26890	GRV2	C			NA	NA	11.3	DnaJ Domain Protein (RME-8)	Endocytosis; vacuolar sorting; protein trafficking
At2g30200	EMB3147	NC		1	P ?	A.2	10.1	ACP-S-Malonyltransferase	Fatty acid biosynthesis
At2g30410	KIS	C			NA	A.1	11.1	Tubulin Folding Cofactor A	Regulation of tubulin folding and microtubule dynamics
At2g30920	EMB3002	NC		4	P / Z	C.2	9	Hexaprenyldihydroxybenzoate Methyltransferase	Ubiquinone biosynthesis
At2g31305	INH3	C			G	A.1	8	Protein Phosphatase 1 Regulatory Subunit	None
At2g31340	EMB1381	C			T	B.2	13	Unknown	None
At2g32590	EMB2795	C			P	B.3 / C.2	6.2	Non-SMC Condensin Complex Subunit H	Sister chromatid segregation in mitosis
At2g33800	EMB3113	C	4		P ?	C.2 / A.3	3.1	Chloroplast 30S Ribosomal Protein S5	Translation in chloroplast
At2g34780	EMB1611	C			P	C.3	13	Uncertain	Putative role in promoting cell division
At2g37560	ORC2	C			G	C.2	1	Origin Recognition Complex Subunit 2	DNA replication, chromatin structure, gene silencing
At2g37920	EMB1513	NC			T	A.2	13	Unknown	None
At2g38020	VCL1	C			Q	B.2	11.3	Vacuolar Protein Sorting (Vps16)	Required for vacuole biogenesis and protein trafficking to the vacuole
At2g38280	FAC1	C			P / Z	NA	10.1	AMP Deaminase	Purine biosynthesis
At2g38670	PECT1	C		1	P	A.3	10.5	Phosphatidylethanolamine Biosynthesis	Rate-limiting enzyme in the CDP-Etn pathway of PE biosynthesis
At2g38770	EMB2765	C			G	A.2	2.3	U5 Associated Protein (Aquarius)	Proposed role in pre-mRNA splicing
At2g39080	EMB2799	NC	4		C	A.2	13	Unknown	Potential role in chloroplast nutrient transport
At2g43360	BIO2	C		4	G	A.1	10.1	Biotin Synthase	Catalyzes the final step in biotin synthesis within the mitochondrion
At2g45000	EMB2766	C			C	C.3	11.3	COPII Coat Protein (Sec31)	Putative chloroplast-localized vesicular trafficking protein
At2g45270	GCP1	C			G	A.3	12	Mitochondrial Glycoprotease	HSP70 superfamily protein
At2g45690	SSE	C		1	C	NA	11.1	Peroxisomal Biogenesis Factor (Pex16)	Required for protein and oil body biogenesis
At3g04460	PEX12	C			T	B.2	11.1	Peroxisomal Protein	RING finger protein required for peroxisome biogenesis
At3g05680	EMB2016	C			G	B.1	13	Unknown	None
At3g06350	EMB3004	C	3		C	A.1	10.1	Dehydroquinate Dehydratase; Shikimate Dehydrogenase	Chorismate biosynthesis
At3g07060	EMB1974	C			C	B.3	13	Unknown	None
At3g10220	EMB2804	C			P	B.3	11.1	Tubulin Folding Cofactor B	Microtubule polymerization
At3g10670	AtNAP7	C	4		G	C.3	12	Plastidic SufC-Like ABC/ATPase	Fe-S cluster maintenance and repair
At3g10690	AtGYRA	C	4	1	C	A.2	1	DNA Gyrase Subunit A	Replication and transcription in chloroplasts and mitochondria
At3g13200	EMB2769	NC			G	B.3	2.3	U5 Associated Protein (Cwc15)	Proposed role in pre-mRNA splicing
At3g14900	EMB3120	C	2		T	A.1	13	Unknown	None
At3g17300	EMB2786	C			P ?	C.3	13	Unknown	Complex 1 (LYR domain) protein
At3g20070	TTN9	C			P	A.2	13	Unknown	None
At3g20400	EMB2743	NC			C	C.3	13	Uncertain	Potential F box protein
At3g20630	TTN6	C			G	A.1	5	UBP14 Deubiquitinating Enzyme	Isopeptidase T class deubiquitinating enzyme required for ubiquitin processing and recycling
At3g24560	RSY3	C			G	C.2	13	Uncertain	ATP binding motif
At3g27670	RST1	C		1	C	A.1	13	Unknown	Cuticular wax formation
At3g27750	EMB3123	C	2		C	A.1	13	Uncertain	VPS9 domain protein
At3g29290	EMB2076	NC			T	B.2	2.2	PPR Protein	Processing of organellar mRNAs
At3g46560	EMB2474	NC		1	P / EG	C.2	4.2	Small Zinc Finger Protein	Similar to mitochondrial inner membrane translocase (TIM9)
At3g48110	EDD	C	5	1	G	A.1	3.2	Glycine tRNA Synthetase	Translation in chloroplast
At3g48470	EMB2423	C			EG	A.1	13	Uncertain	Weak similarity to telomere maintenance protein (Telo2)
At3g54170	FIP37	C			G	B.3	2.3	FKBP12 Interacting Protein	Putative role in alternative pre-mRNA splicing
At3g55010	EMB2818	C	4	1	P ?	B.3	10.1	Phosphoribosylformylglycinamidine Cyclo-ligase (PUR5)	AIR synthetase; Purine biosynthesis
At3g60740	TTN1	C			P	A.2	11.1	Tubulin Folding Cofactor D	Postulated to interact with TTN5 protein to regulate B-tubulin folding and microtubule dynamics
At4g02790	EMB3129	C	1		G	A.2	13	Uncertain	Putative ribosome biogenesis GTPase
At4g02980	ABP1	C			G	A.2	8	Auxin Binding Protein 1	Mediates auxin-induced cell elongation and cell division during embryogenesis
At4g03240	AtFH	C		4	P / Z	A.3	12	Frataxin	Required for biogenesis of mitochondrial Fe-S proteins
At4g04350	EMB2369	C	5		G	A.1	3.2	Leucine tRNA Synthetase	Translation in chloroplast
At4g09980	EMB1691	C			G	A.1	6.1	DNA Methyltransferase	DNA methylation; chromatin structure
At4g10760	EMB1706	C			G	A.1	2.3	Methyltransferase MT-A70	Adenine methylation in pre-mRNAs
At4g14590	EMB2739	NC			G	A.2	13	Uncertain	Potential role in snRNA 3' end formation (Integrator complex)
At4g19350	EMB3006	NC			EG	A.3	13	Unknown	None
At4g20060	EMB1895	C			G	C.1	13	Unknown	None
At4g21800	QQT2	C			P	C.3	11.1	ATP/GTP Binding Protein	Proposed role in microtubule localization
At4g23100	RML1	C	4		C	B.1	10.5	Gamma-Glutamylcysteine Synthetase	First enzyme in glutathione biosynthesis; required for initiation and maintenance of cell division
At4g23660	AtPPT1	NC		5	T	C.3	9	Ubiquinone Biosynthesis	4-Hydroxybenzoate polyprenyl diphosphate transferase
At4g24270	EMB140	NC			G	A.2	13	Uncertain	RNA recognition motif protein
At4g26500	EMB1374	C	5		EG	B.1	12	Activator of Plastidic and Mitochondrial Desulfurases (AtSufE)	Fe-S cluster protein
At4g28210	EMB1923	C	2		C	A.1	13	Unknown	None
At4g29060	EMB2726	C	4		G	C.1	3.3	Translation Elongation Factor Ts	Translation in chloroplast
At4g29660	EMB2752	NC			C	A.3	13	Unknown	None
At4g29860	EMB2757	C			C	B.2	13	Uncertain	WD-40 repeat protein
At4g29910	EMB2798	NC			P ?	A.2	1	Origin of Replication Complex (ORC5)	Initiation of DNA replication
At4g30580	EMB1995	C	4		C	B.1	10.3	Lysophosphatidic Acid Acyltransferase (LPAAT)	Fatty acid and phospholipid metabolism
At4g31160	DCAF1	C			G	A.1	5	Nuclear Ubiquitin E3 Ligase	Protein degradation
At4g31770	DBR1	C			C	A.3	2.3	Lariat Debranching Enzyme	Removal of spliced introns; generation of snoRNAs
At4g33090	APM1	C			C	A.2	12	Bifunctional M1 Aminopeptidase	Proposed role in cellular trafficking
At4g33460	EMB2751	NC	2		C	C.2	11.2	ABC Transporter	Proposed role in membrane transport
At4g36630	EMB2754	NC			C	A.2	11.3	Putative Vacuolar Protein (VPS39)	Proposed role in vacuolar protein sorting
At4g39120	IMPL2	C	4		EG	A.1	10.1	Histidinol-Phosphate Phosphatase	Histidine biosynthesis
At4g39920	POR	C			P	NA	11.1	Tubulin Folding Cofactor C	Regulation of tubulin folding and microtubule dynamics
At5g02250	EMB2730	C	3		C	B.1	2.3	Ribonuclease II Family Protein	3' to 5' exoribonuclease; Maturation of chloroplast rRNAs
At5g05560	EMB2771	NC			C	A.2	6.2	E3 Ubiquitin Ligase (APC1)	Anaphase promoting complex 1; cell cycle regulation
At5g05680	EMB2789	C			EG	B.2	4.2	Nuclear Envelope Protein (Nup88)	Nuclear protein export
At5g06240	EMB2735	NC			C	A.3	13	Unknown	None
At5g08170	EMB1873	C			C	B.1	10.5	Agmatine Iminohydrolase	Polyamine biosynthesis
At5g10480	PAS2	C			C	C.3	10.3	3-Hydroxy-Acyl-CoA Dehydratase	Very-long-chain fatty acid biosynthesis
At5g13480	FY	C			P / Z	A.2	2.3	Nuclear RNA Binding Protein	Highly conserved polyadenylation factor
At5g13690	CYL1	C			P / Z	NA	10.4	Alpha-N-Acetyl-Glucosaminidase (NAGLU)	Arabinogalactan protein metabolism
At5g14320	EMB3137	C	5		G / P	A.3	3.1	Chloroplast 30S Ribosomal Protein S13	Translation in chloroplast
At5g14800	EMB2772	C			P	A.2	10.1	Proline Biosynthesis	Catalyzes final step in proline biosynthesis from glutamate and ornithine
At5g15540	EMB2773	C			P	A.1	6.2	Adherin (AtSCC2)	Sister chromatid cohesion
At5g15920	EMB2782	C			P	B.1	6.2	SMC Family Protein (MSS2)	Chromosome dynamics (SMC5)
At5g18580	FS1	C			C	NA	8	Protein Phosphatase (PP2A)	Intracellular signal transduction pathways
At5g21140	EMB1379	C		1	EG	A.3	13	Uncertain	Weak similarity to DNA repair protein (Nse1)
At5g22010	AtRFC1	C			NA	C.1	1	Replication Factor C Large Subunit	DNA replication and repair
At5g22110	CYL2	C			G	A.2	1	DNA Polymerase Epsilon, Subunit	DNA replication
At5g22640	EMB1211	C	1		C	B.1	13	Uncertain	MORN repeat protein
At5g24670	EMB2820	C			P	A.2	2.3	Adenosine Deaminase (TAD3)	Modification of wobble position of tRNA
At5g27720	EMB1644	C			G	A.1	2.3	U6 snRNA Associated Protein (LSm4)	Component of spliceosome involved in pre-mRNA splicing
At5g27740	EMB2775	C			P / EG	A.1	1	DNA Replication Factor (RFC3)	PCNA loading complex factor
At5g37630	EMB2656	C			EG	A.3	6.2	Chromosome Condensation	Similar to condensin subunit (XCAP-G)
At5g48840	PTS	C			P	B.2	10.1	Pantothenate Synthetase	Biosynthesis of vitamin B5; Coenzyme A (CoA) function
At5g49010	EMB2812	NC			NA	A.3	1	DNA Replication, GINS Complex (SLD5)	DNA replication
At5g49930	EMB1441	C			G	A.1	13	Uncertain	Putative RNA binding protein (Human SDCCAG1)
At5g51020	CRL	C	4		C	A.2	12	Plastid Outer Envelope Membrane Protein	Required for plastid division
At5g51200	EMB3142	NC			P ?	NA	4.2	Nuclear Pore Complex Protein (Nup205)	Nuclear protein export
At5g51430	EYE	C			C	A.3	11.1	Subunit of Golgi (COG) Complex	Proposed role in formation of extracellular matrix
At5g53860	EMB2737	C	1	1	C	A.3	13	Unknown	Putative auxin-regulated protein
At5g56290	EMB2790	C			G	A.1	11.1	Peroxisome Targeting	Peroxisomal protein translocation
At5g56930	EMB1789	C			G	A.1	13	Uncertain	Putative zinc finger domain
At5g57590	BIO1	C			C	B.2	10.1	7-KAP, DAP Aminotransferase; Dethiobiotin Synthetase	Biotin synthesis in mitochondria; Bifunctional (BIO3-BIO1) protein
At5g58250	EMB3143	NC	4		C	NA	13	Unknown	None
At5g59340	WOX2	C			C	A.1	7	Homeodomain Protein	Transcriptional regulation
At5g59440	ZEUS1	C		1	P / Z	A.1	10.1	Thymidylate Kinase	Biosynthesis of dTDP; Regulation of replication
At5g60540	EMB2407	C			G	A.1	10.1	Imidazoleglycerol-Phosphate Synthase Subunit H; Pyroxidine Amidotransferase	Pyroxidine (vitamin B6) biosynthesis
At5g62440	DOM1	C			G	B.3	13	Uncertain	Nucleolar function; Similar to tomato LeDCL
At5g63050	EMB2759	C		4	G	B.2	13	Unknown	None
At5g63420	EMB2746	C	4		G	B.2	2.3	Metallo-Beta-Lactamase Family Protein	Putative chloroplast RNA endounclease (Rnase J)
At5g66680	DGL1	C			G / P	A.3	4.1	OST Complex Subunit	Proposed role in N-linked glycosylation of proteins
a EMB genes without a paralog (BLASTP e-30 cutoff) or evidence of gametophyte defects in loss-of-function mutants. See Table S1 for details on terminal embryo phenotype classes, allele strength ranks, and protein function classes.
b Gene responsible for mutant phenotype confirmed (C) or not confirmed (NC) through allelism tests or molecular complementation.
c Likelihood of protein localization in the chloroplast or mitochondria based on experimental data and prediction programs: from 5 (high) to 1 (low).
