# Supplementary material for: Molecular Foundations of Reproductive Lethality in Arabidopsis thaliana
Source: PLoS One. 2011 Dec 2;6(12):e28398. doi: 10.1371/journal.pone.0028398 (PMC3229588; doi:10.1371/journal.pone.0028398)
Supplement: Table S7 — 36 unique true EMB genes with late phenotypes in putative knockout alleles. (XLS) [file pone.0028398.s007.xls]

## Sheet: Table S7
Locus	Gene Symbol	Identity Statusb	CPT Rankc	Strongest Allele Phenotype	Maximal Allele Strength	Protein Function Class	Predicted Protein Function	Additional Comments on Predicted Protein Function
At3g10690	AtGYRA	C	4	C	A.2	1	DNA Gyrase Subunit A	Replication and transcription in chloroplasts and mitochondria
At1g24706	EMB2793	C		C	B.1	2.1	THO/TREX Complex Component (THO2)	Transcription elongation; mRNP biogenesis; genome integrity
At3g29290	EMB2076	NC		T	B.2	2.2	PPR Protein	Processing of organellar mRNAs
At5g02250	EMB2730	C	3	C	B.1	2.3	Ribonuclease II Family Protein	3' to 5' exoribonuclease; Maturation of chloroplast rRNAs
At1g75350	EMB2184	NC	4	T	B.2	3.1	Chloroplast Ribosomal Protein L31	Translation in chloroplast
At1g64790	ILA	NC	1	T	B.2	3.3	Translational Activator (GCN1)	Regulation of translation
At5g05560	EMB2771	NC		C	A.2	6.2	E3 Ubiquitin Ligase (APC1)	Anaphase promoting complex 1; cell cycle regulation
At1g49770	RGE1	C		C	A.2	7	bHLH Protein	Regulation of transcription
At5g59340	WOX2	C		C	A.1	7	Homeodomain Protein	Transcriptional regulation
At1g15220	AtCCMH	NC		C	B.2	9	Mitochondrial Cytochrome C Maturation	Mitochondrial thiol-disulfide oxidoreductase
At3g06350	EMB3004	C	3	C	A.1	10.1	Dehydroquinate Dehydratase; Shikimate Dehydrogenase	Chorismate biosynthesis
At5g57590	BIO1	C		C	B.2	10.1	7-KAP, DAP Aminotransferase; Dethiobiotin Synthetase	Biotin synthesis in mitochondria; Bifunctional (BIO3-BIO1) protein
At2g19450	TAG1	C		C	A.2	10.3	Diacylglycerol Transferase (DGAT)	Enzyme in Kennedy pathway of storage lipid biosynthesis
At4g30580	EMB1995	C	4	C	B.1	10.3	Lysophosphatidic Acid Acyltransferase (LPAAT)	Fatty acid and phospholipid metabolism
At1g11680	EMB1738	C		C	A.1	10.5	Obtusifoliol 14-Alpha Demethylase (CYP51)	Cytochrome P450 monooxygenase; Catalyzes sterol biosynthestic step upstream of FACKEL
At1g20050	HYD1	C		C	A.2	10.5	Sterol Isomerase	Catalyzes sterol biosynthetic step downstream of FACKEL
At4g23100	RML1	C	4	C	B.1	10.5	Gamma-Glutamylcysteine Synthetase	First enzyme in glutathione biosynthesis; required for initiation and maintenance of cell division
At5g08170	EMB1873	C		C	B.1	10.5	Agmatine Iminohydrolase	Polyamine biosynthesis
At2g26350	PEX10	C		T	A.2	11.1	Peroxisomal Protein	Membrane protein associated with peroxisomes
At3g04460	PEX12	C		T	B.2	11.1	Peroxisomal Protein	RING finger protein required for peroxisome biogenesis
At4g36630	EMB2754	NC		C	A.2	11.3	Putative Vacuolar Protein (VPS39)	Proposed role in vacuolar protein sorting
At1g53580	ETHE1	C		T	B.2	12	Glyoxylate-Like Protein	Similar to human gene responsible for ethylmalonic encephalopathy
At4g33090	APM1	C		C	A.2	12	Bifunctional M1 Aminopeptidase	Proposed role in cellular trafficking
At5g51020	CRL	C	4	C	A.2	12	Plastid Outer Envelope Membrane Protein	Required for plastid division
At1g49510	EMB1273	C	2	C	A.2	13	Unknown	None
At1g56200	EMB1303	C	5	C	A.1	13	Unknown	None
At2g03150	EMB1579	C		C	A.1	13	Uncertain	Putative calcium binding protein
At2g31340	EMB1381	C		T	B.2	13	Unknown	None
At2g37920	EMB1513	NC		T	A.2	13	Unknown	None
At2g39080	EMB2799	NC	4	C	A.2	13	Unknown	Potential role in chloroplast nutrient transport
At3g14900	EMB3120	C	2	T	A.1	13	Unknown	None
At3g27670	RST1	C		C	A.1	13	Unknown	Cuticular wax formation
At3g27750	EMB3123	C	2	C	A.1	13	Uncertain	VPS9 domain protein
At4g28210	EMB1923	C	2	C	A.1	13	Unknown	None
At4g29860	EMB2757	C		C	B.2	13	Uncertain	WD-40 repeat protein
At5g22640	EMB1211	C	1	C	B.1	13	Uncertain	MORN repeat protein
a See Table S1 for details on terminal embryo phenotype classes, allele strength ranks, and protein function classes.
b Gene responsible for mutant phenotype confirmed (C) or not confirmed (NC) through allelism tests or molecular complementation.
c Likelihood of protein localization in the chloroplast based on experimental data and prediction programs: from 5 (high) to 1 (low).
