# Supplementary material for: Molecular Foundations of Reproductive Lethality in Arabidopsis thaliana
Source: PLoS One. 2011 Dec 2;6(12):e28398. doi: 10.1371/journal.pone.0028398 (PMC3229588; doi:10.1371/journal.pone.0028398)
Supplement: Table S8 — 59 GAM or GEM genes with severe defects in male gamete transmission. (XLS) [file pone.0028398.s008.xls]

## Sheet: Table S8
Chromosome Locus	Identity Statusb	Gene Symbol	Gene Redundancy (BLASTP)c	Gametophyte Subclass	Transmission Defect	Homozygotes	Male Gametophyte Phenotype	Protein Function Class	Predicted Function of Gene Product	Reference Lab	Year
At1g02140	C	HAP1; MAGO; MEE63	Unique	GAM	MMM / +	[EMBi]	T	2.3	Component of Exon Junction Complex	D. Preuss	2004
At1g08660	C	MGP2	Redundant	GAM	0 ♂ / +	NA	GT	10.5	Golgi-localized Sialyltransferase	D. Ye	2010
At1g11890	C	SEC22	Unique	GAM	0 ♂ / FFF	NA	D	11.3	v-SNARE Protein; ER and Golgi Secretory Trafficking	G. Jurgens	2011
At1g14830	C	ADL1C; ADL5; DRP1C	Redundant	GAM	0 ♂ / +	NA	D	11.3	Plasma Membrane Dynamics	S. Bednarek	2003
At1g19520	NC	NFD5	Redundant	GAM	MMM / FF	[EMBi]		13	Unknown; Mitochondrial Protein	G. Drews	2006
At1g20200	NC	EMB2719; HAP15	Redundant	GEM	MMM / +	EMB	T	5	26S Proteasome Regulatory Subunit (RPN3)	D. Meinke	2002
At1g24450	NC	NFD2	Unique	GAM	0 ♂ / FFF	NA		2.3	Ribonuclease III	G. Drews	2006
At1g31817	NC	NFD3	Unique	GAM	MMM / FF	[EMBi]		3.1	Mitochondrial Ribosomal Protein S11	G. Drews	2006
At1g50240	C	FU; TIO	Redundant	GAM	0 ♂ / FFF	NA	D	8	Serine/Threonine Protein Kinase	D. Twell	2005
At1g60490	C	AtVPS34; PI3K	Redundant	GAM	0 ♂ / +	NA	D	12	Phosphatidylinositol 3-Kinase	Y. Lee	2008
At1g64570	C	DUO3	Unique	GAM	0 ♂ / +	NA	Not G	13	Uncertain	D. Twell	2009
At1g68990	C	RPOTm; RPOMT	Redundant	GEM	MMM / FF	[EMBi]		2.1	Mitochondrial RNA Polymerase	J. Whelan	2009
At1g71270	C	VPS52; POK; TTD8	Redundant	GAM	MMM / +	[EMBi]	T	11.3	Membrane Trafficking	S. Bonhomme	2008
At1g74260	C	PUR4	Unique	GAM	0 ♂ / F	NA	D	10.1	De Novo Purine Biosynthesis Pathway	F. Budar	2008
At1g77140	C	VPS45	Unique	GAM	0 ♂ / F	NA	G	11.3	Vacuolar Sorting Receptor Recycling	D. Bassham	2009
At1g78900	C	VHA-A	Unique	GAM	0 ♂ / F	NA	D	11.2	Vacuolar Proton Pump	K. Schumacher	2005
At2g03120	C	AtSPP	Unique	GAM	MMM / +	[EMBi]	G	4.1	Signal Peptide Peptidase	D. Schnell	2009
At2g20585	NC	NFD6	Unique	GAM	MMM / FF	[EMBi]		13	Unknown; Mitochondrial Protein	G. Drews	2006
At2g21870	C	MGP1	Unique	GAM	0 ♂ / F	NA	D	9	Mitochondrial ATP Synthase	D. Ye	2010
At2g34220	NC	PDD12; MEE20	Redundant	GAM	0 ♂ / FF	NA	D	13	Unknown	S. McCormick	2009
At2g34680	C	SETH1; AIR9	Unique	GAM	MMM / +	[EMBi]	GT	11.1	Microtubule-Associated Protein	D. Twell	2004
At2g35070	NC	PGD4	Redundant	GAM	0 ♂ / FF	NA	G	13	Unknown	S. McCormick	2009
At2g39990	C	AteIF3f	Unique	GAM	MMM / +	EMB	G	3.3	Translation Initiation Factor	D. Ye	2010
At2g43040	C	NPG1	Redundant	GAM	0 ♂ / +	NA	G	8	Calmodulin Binding Protein	A. Reddy	2003
At3g01780	C	TPLATE	Unique	GAM	0 ♂ / +	NA	DG	11.3	Vesicle Trafficking; Cell Wall Modification	D. Geelen	2006
At3g05530	C	RPT5a	Redundant	GAM	0 ♂ / F	NA	D	5	Proteasome AAA-ATPase	P. Guerche	2009
At3g09840	C	CDC48	Redundant	GEM	MMM / F	EMB	GT	4.1	AAA-ATPase Chaperone	S. Bednarek	2008
At3g10380	C	SEC8	Unique	GAM	0 ♂ / +	NA	G	11.3	Plasma Membrane Vesicle Docking	J. Fowler	2005
At3g12280	C	Rb; RBR	Unique	GAM	MMM / 0 ♀	NA	D	6.2	Repressor of cell proliferation	F. Berger	2009
At3g16640	NC	TCTP	Redundant	GEM	MMM / +	[EMBi]	T	8	GTPase; TOR Signaling Pathway	J. Masle	2008
At3g45100	NC	SETH2	Unique	GAM	MMM / +	[EMBi]	GT	12	GPI Anchor Biosynthesis	D. Twell	2004
At3g45150	NC	TCP16	Unique	GAM	0 ♂ / F	NA	D	7	Putative Transcription Factor	C. Ueguchi	2006
At3g54690	C	SETH3	Unique	GAM	0 ♂ / +	NA	Not D	10.5	Arabinose-5-Phosphate Isomerase	D. Twell	2004
At3g60460	C	DUO1	Redundant	GAM	0 ♂ / +	NA	F	7	R2R3 MYB Transcription Factor	D. Twell	2005
At3g61710	C	ATG6; AtVPS30	Unique	GAM	0 ♂ / F	NA	G	11.3	Vacuolar Protein Sorting	Y. Ohsumi	2007
At4g00330	NC	PDD25; CRCK2	Redundant	GAM	0 ♂ / F	NA	D	8	Calmodulin-Binding Receptor-Like Kinase	S. McCormick	2009
At4g00800	NC	SETH5	Unique	GAM	MMM / F	[EMBi]	G	11.3	Putative Vps8 Homolog	D. Twell	2004
At4g01220	C	MGD4	Redundant	GAM	0 ♂ / +	NA	T	10.5	Xylosyltransferase	D. Ye	2011
At4g02195	NC	SYP42; AtTLG2B	Redundant	GAM	0 ♂ / X	NA	G	11.3	Transport Vesicle-Membrane Fusion	N. Raikhel	2001
At4g11720	C	HAP2; GCS1	Unique	GAM	MMM / +	[EMBi]	TF	13	Uncertain; Putative Membrane Protein	D. Preuss	2006
At4g14790	NC	PDD17; PDD26; AtSUV3	Redundant	GEM	MMM / F	[EMBi]	D	2.2	RNA Helicase	S. McCormick	2009
At4g21150	NC	HAP6	Unique	GAM	0 ♂ / F	NA	T	11.3	Membrane Trafficking	D. Preuss	2004
At4g24580	C	REN1	Redundant	GAM	0 ♂ / +	NA	T	11.3	Rho GTPase-Activating Protein	Z. Yang	2008
At4g32410	C	RSW1; CESA1	Redundant	GAM	0 ♂ / X	NA	D	10.4	Cellulose Synthase Catalytic Subunit	C. Somerville	2007
At4g34940	C	ARO1; SETH4	Redundant	GAM	0 ♂ / +	NA	Not D	8	Armadillo Repeat Protein	S. Sprunck	2008
At4g36480	C	EMB2779; LCB1; FBR11	Redundant	GAM	0 ♂ / F	NA	D	10.3	Serine Palmitoyltransferase (LCB1); Sphingolipid Biosynthesis	J. Zuo	2008
At4g38190	C	CSLD4	Redundant	GAM	0 ♂ / +	NA	G	10.4	Putative Glycosyltransferase; Cell Wall Biosynthesis	W. Willats	2008
At5g05170	C	CEV1; IXR1; CESA3	Redundant	GAM	0 ♂ / X	NA	D	10.4	Cellulose Synthase CeSA3	C. Somerville	2007
At5g14870	C	CNGC18	Redundant	GAM	0 ♂ / +	NA	T	11.2	Cyclic Nucleotide Gated Channel	J. Harper	2007
At5g16830	C	SYP21; PEP12	Redundant	GAM	0 ♂ / X	NA	G	11.3	Transport Vesicle-Membrane Fusion	N. Raikhel	2001
At5g19610	C	GNL2	Redundant	GAM	0 ♂ / +	NA	G	11.3	ADP-Ribosylation Factor-Guanine Nucleotide Exchange Factor	D. Ye	2009
At5g22130	N	PNT1	Unique	GEM	MMM / +	EMB		10.5	ER-Localized Mannosyl Transferase	S. Gillmor	2005
At5g26980	NC	SYP41	Redundant	GAM	0 ♂ / X	NA		11.3	Transport Vesicle-Membrane Fusion	N. Raikhel	2001
At5g52560	C	AtUSP	Unique	GAM	0 ♂ / X	NA		10.5	UDP-Sugar Phosphorylase; Salvage Pathway Enzyme	Y. Tsumuraya	2007
At5g55810	C	AtNMNAT	Unique	GAM	MMM / +	EMB	T	10.1	NAD Biosynthesis/ Pollen Development	H. Uchimiya	2007
At5g57350	C	AHA3	Redundant	GAM	0 ♂ / +	NA	D	11.2	Plasma Membrane Proton Pump	M. Sussman	2004
At5g63890	C	HISN8; HDH; PDD3	Unique	GAM	0 ♂ / F	NA	D	10.1	Histidine Biosynthesis	D. Meinke	2007
At5g64560	C	MGT9	Redundant	GAM	0 ♂ / +	NA	D	11.2	Low-Affinity Magnesium Transporter	D. Li	2009
At5g66760	C	SDH1-1	Redundant	GAM	0 ♂ / F	NA	D	9	Component of Mitochondrial Succinate Dehydrogenase Complex	X. Jordana	2007
a See Table S2 for details on gametophyte subclasses, transmission defects, homozygotes, male gametophyte defects, and protein function classes.
b Gene responsible for mutant phenotype confirmed (C) or not confirmed (NC) through molecular complementation or the analysis of multiple insertion lines.
c Unique genes lack a significant match in Arabidopsis (e-30 cutoff); Redundant genes have a significant match (e-30 cutoff) that may indicate functional redundancy.
